# Supplementary material for: Paleoearthquake reconstruction on an impure limestone fault scarp at Sparta, Greece
Source: Copernicus journal article supplement (doi:10.5194/egusphere-2023-1585), 2023-07-17
Supplement: Supplementary file [file egusphere-2023-1585-RC3-supplement.pdf]

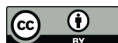

1 **Paleoearthquake reconstruction on an impure limestone fault scarp at Sparta, Greece**

2

3 Bradley W. Goodfellow<sup>1,2,3,4</sup>, Marc W. Caffee<sup>5,6</sup>, Greg Chmiel<sup>5</sup>, Ruben Fritzon<sup>1,3#</sup>, Alasdair  
4 Skelton<sup>2,3</sup>, Arjen P. Stroeven<sup>1,3\*</sup>

5

6 <sup>1</sup>Geomorphology and Glaciology, Department of Physical Geography, Stockholm University, Stockholm,  
7 Sweden

8 <sup>2</sup>Department of Geological Sciences, Stockholm University, Stockholm, Sweden

9 <sup>3</sup>Bolin Centre for Climate Research, Stockholm University, Stockholm, Sweden

10 <sup>4</sup>Geological Survey of Sweden, Killiansgatan 10, Lund, Sweden

11 <sup>5</sup>Department of Physics and Astronomy/Purdue Rare Isotope Measurement Laboratory,  
12 Purdue University, West Lafayette, USA

13 <sup>6</sup>Department of Earth, Atmospheric, and Planetary Sciences, Purdue University, West  
14 Lafayette, USA

15

16 \*Corresponding author

17 Email: arjen.stroeven@natgeo.su.se

18 Phone: +46(0)8-16 4230

19 #Now at Celsiusskolan, Sporthallsvägen 7, 828 33 Edsbyn, Sweden

20

21

22 **Abstract**

23

24 Reliable reconstructions of paleoseismicity are useful for understanding, and mitigating,  
25 seismic hazard risks. In this study, we apply cosmogenic <sup>36</sup>Cl exposure-age dating and  
26 concentrations of rare-earth elements and yttrium (REY) to unravelling the paleoseismic  
27 history of the Sparta fault, Greece, which is a range-bounding normal fault developed in  
28 limestone. Modeling of <sup>36</sup>Cl concentrations along two vertical profiles on the Sparta Fault  
29 indicates a clustering of four earthquakes within a 1.5 kyr period that culminated with the 464  
30 B.C.E. event that devastated Spartan society. Cumulative uplift was as high as 2.8 mm yr<sup>-1</sup>  
31 during that period, compared with ~0.6–0.9 mm a<sup>-1</sup> over the preceding 2.7–4.4 kyr. Because  
32 earthquake activity may shift between faults in extensional settings, a large magnitude  
33 earthquake is not necessarily indicated as being overdue by the present ~2.5 kyr quiescent  
34 period. More generally, accurate identification of individual earthquakes is presently  
35 constrained by spatial variations in <sup>36</sup>Cl concentration profiles that reflect neither exposure  
36 duration nor imprints of former soil profiles. In cases where this is attributable to



37 mineralogical variations, such as in the Sparta fault scarp, present chemical preparation  
38 techniques for AMS measurement of  $^{36}\text{Cl}$  may insufficiently account for those variations.

39

40 The Sparta fault scarp is composed of fault breccia, which contains quartz and clay-lined  
41 pores, in addition to host rock-derived clasts of calcite and microcrystalline calcite cement.

42 The exchange of REY between the hanging wall colluvium and the fault scarp calcite, which  
43 has been applied to the study of paleoseismicity on other limestone normal faults, is  
44 overwhelmed on this fault scarp by REY attached to the breccia pore clays. Holocene  
45 earthquakes and their magnitudes, inferred from fault slip lengths, therefore cannot be  
46 inferred from REY data for impure limestone faults such as the Sparta fault but, rather, these  
47 data may indicate processes of fault evolution in the Earth's near surface.

48

49

## 50 **Keywords**

51  $^{36}\text{Cl}$  exposure dating; earthquake; limestone; normal fault; REY elements; Sparta fault

52

## 53 **1 Introduction**

54

55 Seismic hazard risks are significant in many parts of the world and studying the magnitude,  
56 recurrence, mechanisms, and impacts of past earthquakes helps form a basis for mitigating  
57 current and future risk. While historical earthquake records are a crucial archive (Gürpınar,  
58 2005), their spatial distribution is patchy and the recurrence interval of large earthquakes on  
59 many faults exceeds historical record lengths. Paleoseismic studies that use geologic evidence  
60 to infer past earthquakes, and even potentially unravel key earthquake characteristics, such as  
61 timing, recurrence intervals, and the magnitudes of slip and shaking intensity, are therefore an

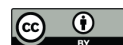

62 essential component of seismic hazard risk mitigation (McCalpin, 2009, p. 24). Topographic  
63 expressions of tectonic faults, the displacement of surficial sediments revealed in trenches,  
64 and geochemical alterations on subaerially exposed fault surfaces, may each provide evidence  
65 useful to the study of paleoseismicity (e.g., Benedetti et al., 2002; Dramis and Blumetti,  
66 2005; Michetti et al., 2005; Carcaillet et al., 2008; Manighetti et al., 2010; Mouslopoulou et  
67 al., 2011; Smith et al., 2014; Cowie et al., 2017; Mozafari et al., 2022). In this study we use  
68 cosmogenic  $^{36}\text{Cl}$  and concentrations of rare-earth elements and yttrium (REY) to study the  
69 paleoseismic history of the Sparta fault at Anogia, Greece (Fig. 1a, b).

70

71 The Mediterranean is a densely populated seismically active region that was subjected to  
72 7360 earthquakes of magnitude ( $M$ )  $> 4$  during 1998–2010 (Godey et al., 2013). Within the  
73 Aegean tectonic plate (Fig. 1a), and around its margins, there were  $>1450$  such earthquakes  
74 during this period, 77 of which were  $M > 5$ . In central Greece, earthquakes are associated  
75 with normal faults, which occur because of extension of the Aegean plate (Jolivet et al.,  
76 2013). In limestone, they may be identified by spectacular scarps, which form from the  
77 accumulation of bedrock slip that occurs during successive earthquakes. Holocene fault  
78 scarps can be well-preserved (Armijo et al., 1991), which makes them potentially suitable  
79 targets for paleoseismic studies.

80

81 Earthquakes inferred from incremental slips of limestone normal faults have been dated with  
82 concentrations of *in situ*-produced cosmogenic  $^{36}\text{Cl}$  (Zreda and Noller, 1998; Mitchell et al.,  
83 2001; Benedetti et al., 2002; Palumbo et al., 2004; Schlagenhauf et al., 2010; Tesson et al.,  
84 2016; Cowie et al., 2017; Mozafari et al., 2022). This nuclide is produced from spallogenic  
85 and muonic reactions that occur in  $^{40}\text{Ca}$  when limestone is exposed to cosmogenic radiation.  
86 Following an earthquake, the newly exposed scarp segment accumulates  $^{36}\text{Cl}$ , the



87 concentration of which is dependent upon the duration of subaerial exposure, thereby  
88 potentially allowing the **earthquake to be dated**. More recently,  $^{36}\text{Cl}$  dating has been  
89 complemented with measurements of REY because their distribution vertically along fault  
90 scarps may indicate imprints of former hanging-wall soil REY that have been uplifted by  
91 successive earthquakes (Carcaillet et al., 2008; Manighetti et al., 2010; Mouslopoulou et al.,  
92 2011; Moraetis et al., 2015). Peaks in REY may represent former soil surfaces and their  
93 spacing may permit paleoseismic inferences such as the number of slip events, vertical  
94 displacement lengths, and earthquake magnitudes. These inferences **can be made**  
95 independently of  $^{36}\text{Cl}$  measurements, which can help to verify and strengthen **interpretations**  
96 of past earthquakes using this nuclide.

97

98 A pioneering cosmogenic  $^{36}\text{Cl}$  study of the Sparta fault by Benedetti et al. (2002) guided our  
99 interest because they found evidence at Parori (Fig. 1b) for the historically recorded 464  
100 B.C.E. earthquake that destroyed Sparta (Armijo et al., 1991), and inferred an additional five  
101 older earthquakes. However, they were unable to date the historical slip at nearby Anogia.

102 Our study objectives were to: (i) **Re-date** the paleoseismicity of the Sparta fault at Anogia, to  
103 test for the surprising absence of the 464 B.C.E. earthquake, by taking advantage of recent  
104 advances in both the measurement of  $^{36}\text{Cl}$  and earthquake modelling that accounts for all  $^{36}\text{Cl}$   
105 production pathways and shielding effects (Schlagenhauf et al., 2010), and; (ii) Complement  
106 the  $^{36}\text{Cl}$  dating with measurement of REY to best constrain the paleoseismic history of this  
107 fault.

108

## 109 **2 Geological Setting**

110



111 The Sparta fault is a 64 km long, NNW–SSE striking, range-bounding normal fault in  
112 southern Peloponnese (Fig. 1a, b). It separates the eastern flank of the Taygetos Mountains  
113 (maximum elevation of 2407 m a.s.l.) from the Sparta Basin (Fig. 1b). The Sparta fault is part  
114 of a larger normal fault system, which exceeds 150 km in length, and is matched on the  
115 western margin of the Taygetos Mountains by the antithetical Kalamata fault and other  
116 similar faults located offshore of the Mani Peninsula (Fig. 1a; Armijo et al., 1991). The  
117 subaerially exposed scarp of the Sparta fault is developed in late Senonian-Eocene limestones  
118 of the Ionian unit (Institute for Geology and Subsurface Research, 1969; Armijo et al., 1991).  
119 Folded and tilted Permian to early Triassic pelitic and psammitic sedimentary and  
120 metasedimentary units outcrop in the Taygetos Mountains and are also offset by the Sparta  
121 fault at depth (Institute for Geology and Subsurface Research, 1969; Armijo et al., 1991).  
122 Geomorphic evidence for Quaternary uplift along the eastern flank of the Taygetos  
123 Mountains includes steep triangular facets ( $20^{\circ}$ – $40^{\circ}$ ) that are hundreds of meters high along  
124 the central portion of the range and decrease in height towards the N and S, wineglass  
125 canyons, perched valleys, and alluvial fans having up to 4 m of entrenchment near the Sparta  
126 fault trace (Armijo et al., 1991; Benedetti et al., 2002; Pope and Wilkinson, 2005;  
127 Papanikolaou et al., 2013). Collectively, the evidence indicates a tectonically active  
128 environment.

129

130 The Sparta fault scarp is nearly continuous along strike and it reaches a maximum height of  
131 10–12 m in its central portion but tapers towards both ends. Hanging wall erosion associated  
132 with stream incision can locally form higher scarp segments. The scarp has a  $65^{\circ}$ – $68^{\circ}$  dip  
133 and, in all but a few locations, slickensides have been eroded away following exhumation.  
134 The slope of the hanging wall ground surface matches that upslope of the footwall, which  
135 indicates a contiguous hillslope prior to formation of the present scarp and that sediment



136 accumulation at the scarp base is generally minor. However, wedges of sediment are locally  
137 present on the hanging wall and in some places are welded to the scarp face, in positions now  
138 perched above the hanging wall (Fig. S1). These wedges may have been perched by  
139 earthquake-induced displacement on the Sparta fault or are debris deposits from mass  
140 movements that have partly eroded. It is possible that other sediment wedges were also  
141 formerly attached to the scarp face but have since fallen off.

142

143 Our sampling site is located at Anogia, where the Sparta fault scarp is 6.8 m high (Fig. 1c),  
144 sparsely fractured, and displays a smooth surface texture (Fig. 1d-e). Slickenside traces are  
145 visible, and the surface displays a black coating, like those commonly occurring on limestone  
146 and which contain higher concentrations of  $\text{SiO}_2$  and  $\text{Al}_2\text{O}_3$  than the underlying rock  
147 (Carcaillet et al., 2008). The scarp surface at Anogia also displays a spatially variable  
148 distribution of subaerial weathering features such as rills and dissolution pits, which we  
149 avoided in our sampling. The lower-angle hillslopes on both the foot wall (above the fault  
150 scarp) and hanging wall display a patchy distribution of frequent bedrock outcrops and an  
151 indurated allochthonous regolith composed of limestone clasts, with a matrix of red aeolian  
152 dust and calcite cement. An outcrop of limestone about 50 m upslope of the fault scarp  
153 reveals folded and tilted bedding. The bedding nearest to the scarp has a dip of  $45\text{--}60^\circ$  and a  
154 strike of  $268\text{--}279^\circ$ , which corresponds with those for the fault scarp, indicating that faulting  
155 appears to exploit these structural weaknesses in the bedrock.

156

157

### 158 **3 Methods**

159



160 To study the paleoseismicity of the Sparta fault, we combined Accelerated Mass  
161 Spectrometry (AMS) measurements of cosmogenic  $^{36}\text{Cl}$  concentrations from samples  
162 collected from the Sparta fault scarp with field and laboratory analyses of scarp composition  
163 and mineralogy, and with field measurements of hanging wall soil composition and pH. We  
164 made these measurements by sampling a vertical  $^{36}\text{Cl}$  profile at Anogia, upwards from the  
165 ground surface and adjacent to the sampling transect of Benedetti et al. (2002) for direct  
166 comparison with that pre-existing record (Fig. 1c). We also took samples for  $^{36}\text{Cl}$  and  
167 mineralogical analyses, including REY, from a second vertical profile located about 50 m to  
168 the south (Fig. 1c). We chose this additional site for its smooth, non-fractured, fault scarp  
169 surface, and sampling was completed from the top of the scarp to 80 cm below the present  
170 ground surface, following hand excavation of a pit.

171

### 172 3.1 $^{36}\text{Cl}$ concentrations

173 We sampled the first profile, adjacent to the southern margin of the Benedetti et al. (2002)  
174 profile, for  $^{36}\text{Cl}$  by using an angle grinder to cut  $10*20*2.5$  cm ( $h*w*d$ ) slabs from the  
175 ground surface to a height of 3.9 m (Fig. 1c, d). Because of a crack in the fault scarp at 1.1 m  
176 above the ground, the transect was shifted sideways (towards the north) by 40 cm, thus  
177 duplicating the measurement at 1.1 m. A total of 37 samples from this profile were measured  
178 for  $^{36}\text{Cl}$  concentration. We sampled the second profile, ~ 50 m further to the south, for  $^{36}\text{Cl}$   
179 and mineralogical analyses initially by drilling 14 cores of 4 cm diameter to a depth of 3 cm  
180 into the scarp surface (Fig. 1c, e). Four of these cores were spaced at 20 cm intervals below  
181 the ground surface and eight were spaced at 80 cm intervals above the ground surface to a  
182 height of 6.4 m, which is 0.4 m below the top of the scarp. These samples were augmented by  
183 another two drill core samples at 1.2 m and at 6.0 m. Subsequently, we took 20 samples from  
184 this profile using an angle grinder to cut  $10*20*2.5$  cm ( $h*w*d$ ) slabs from the ground

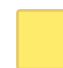

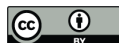

185 surface to a height of 2.0 m (Fig. 1c). A total of 71 samples from the three profiles were  
186 subjected to preparation chemistry for  $^{36}\text{Cl}$  targets and measured using AMS.  
187  
188 For  $^{36}\text{Cl}$  measurements, limestone samples were crushed to approximately 0.5 mm diameter  
189 and the whole sample was used without removing any size fraction through sieving. Prior to  
190 partial dissolution approximately 120 g of crushed material was washed with deionized water  
191 to remove fines. Following Stone et al. (1996), meteoric  $^{36}\text{Cl}$  was removed using two cycles  
192 of partial dissolution with nitric acid to dissolve 5% (by mass) of the carbonate each time. To  
193 prepare the AMS target we used 30 g of dried sample, spiked with 1 mg of  $^{35}\text{Cl}$ -enriched  
194 sodium chloride carrier (Source: Icon Isotopes,  $^{35}\text{Cl}$  99.635 atom %,  $^{35}\text{Cl}/^{37}\text{Cl} = 273$ ) to  
195 measure native chloride by isotope dilution. A slurry of the sample and 120 g of deionized  
196 water was slowly dissolved with 60 g of concentrated trace-metal grade nitric acid. Post-  
197 dissolution, both liquid and undissolved solids were quantitatively transferred to a centrifuge  
198 bottle where the solids were removed by centrifugation. The supernatant was decanted to  
199 another centrifuge bottle and chloride was precipitated using one molar silver nitrate. After a  
200 settling period, the bottle was centrifuged to isolate the silver chloride which was then  
201 washed, dissolved with ammonium hydroxide, and treated with barium nitrate to remove  
202 sulfate in preparation for further purification by chromatography. The solution was loaded  
203 onto 5 ml of Bio-Rad AG 1-X8 strong anion-exchange resin and chloride was moved through  
204 with 0.50 mmol, and then 0.150 mmol, nitric acid. After re-precipitation with silver nitrate  
205 and a washing step the silver chloride was dried and packed into silver bromide-cored copper  
206 holders. AMS measurements were performed at the Purdue Rare Isotope Measurement  
207 Laboratory according to procedures in Muzikar et al. (2003); standards used for the  
208 measurement are described in Sharma et al. (1990).  
209





210 We applied a model developed by Schlagenhauf et al. (2010) for the interpretation of  
211 earthquakes from cosmogenic  $^{36}\text{Cl}$  concentrations to the Sparta fault scarp. This model  
212 accounts for various parameters that control the  $^{36}\text{Cl}$  concentration in a limestone normal  
213 fault scarp, including geomagnetic field variations, host rock and hanging wall colluvium  
214 chemical compositions and densities, scarp erosion rate, shielding of the scarp base by a  
215 colluvial wedge, and the geometries of the fault scarp, the slope above the scarp, and the  
216 hanging wall colluvial wedge. Their model uses three statistical parameters, the weighted root  
217 mean square (RMSw), the reduced Chi-square ( $\chi_{red}^2$ ), and Akaike Information Criterion  
218 (AIC) to assess the quality of fit between modelled and measured data to provide an objective  
219 assessment of the number, and spatial and temporal spacing, of inferred earthquakes. For our  
220 age calculations, we used the sea-level high-latitude (SLHL)  $^{36}\text{Cl}$  production rate from  
221 spallation in calcite of  $59.4 \text{ atoms g}^{-1} \text{ yr}^{-1}$  and a temporally variable geomagnetic field to scale  
222 the  $^{36}\text{Cl}$  production rate from Lifton et al. (2005). A more recent  $^{36}\text{Cl}$  production rate  
223 calibration by Marrero et al. (2016) is not used here because it is scaled using Lifton et al.  
224 (2014), which is not included in the model of Schlagenhauf et al. (2010). The Marrero et al.  
225 (2016) production rate overlaps with the  $^{36}\text{Cl}$  production rate from Lifton et al. (2005), within  
226 uncertainty. We complemented the modelling of our new  $^{36}\text{Cl}$  results with a re-modelling of  
227 the Benedetti et al. (2002) data, using our own data for fault scarp and colluvium  
228 composition. Our method of inferring earthquakes was based on fitting  $^{36}\text{Cl}$  concentration  
229 profiles derived from the Schlagenhauf et al. (2010) model to the actual  $^{36}\text{Cl}$  concentration  
230 profiles and inferring former soils surfaces from inflection points in the real  $^{36}\text{Cl}$   
231 concentration profiles. This allows us to best constrain the paleoseismic history of the Sparta  
232 fault over the late Holocene.

233

### 234 3.2 Sparta fault scarp composition



235 Fault scarp chemical composition and mineralogy were analyzed from the second sampling  
236 profile, 50 m to the south of the first sampling profile, as follows. An initial elemental  
237 analysis was done in the field on the Sparta fault scarp surface using an Olympus Innov-X  
238 Delta (40 kV) handheld X-ray fluorescence (XRF) device. This instrument performs  
239 elemental analyses with a circular sample spot of 8 mm diameter and can measure elements  
240 heavier than Na. All elements lighter than Mg are reported as lighter elements (LE). Of the  
241 elements that compose REY, it was only capable of measuring yttrium. Sampling was done at  
242 an interval of 5 cm (or less) over a 7.7 m vertical profile, beginning ~90 cm below the  
243 hanging wall soil surface. This profile corresponds with the location of the drill core and 2.0  
244 m-long <sup>36</sup>Cl profiles but was measured before either drilling or slab sampling (Fig. 1c).

245

246 For more detailed analyses of elements, including REY, a total of 39 cores (22 mm and 35  
247 mm diameters and to depths of ~4 cm) were collected every 20 cm from the fault scarp  
248 vertical transect using a portable drill (Fig. 1d). The outermost 1 mm was removed from each  
249 core prior to crushing to avoid contamination from the black surface coating. The next 15 mm  
250 of each core were then rinsed with cold water, air dried, and crushed using a grinder with a  
251 steel mortar to a grain size of <100 µm. This crushing technique might supply additional  
252 REY to samples (Hickson and Juras, 1986) but if so, this likely occurs systematically across  
253 samples and we are more interested in spatial trends, which we confirm independently using  
254 the handheld XRF, than absolute abundances. The crushed samples were then analyzed for  
255 major and trace elements using fusion inductively coupled plasma mass spectrometry (FUS-  
256 ICP-MS) at Activation Laboratories (Ontario, Canada).

257

258 We complemented the FUS-ICP-MS analyses with spot elemental analysis of one rock core  
259 from 1.1 m above the scarp base to make a high-resolution determination of any spatial



260 variations in the scarp composition. This was done with an energy-dispersive X-ray  
261 spectroscope (EDS) attached to an environmental scanning electron microscope (ESEM). We  
262 used a Quanta FEG 650 with Oxford-Inka EDS, and the analysis was made in a high-vacuum  
263 environment at 20 kV. The technique is incapable of detecting REY because their  
264 concentrations are too low. Photomicrographs and backscatter images of pore spaces were  
265 also taken using the ESEM. These analyses were completed at the Department of Geological  
266 Sciences, Stockholm University.

267

### 268 **3.3 Sparta fault scarp mineralogy**

269 A modal analysis of mineral fractions was completed on thin sections taken from the  
270 remaining 38 core samples. This was done by counting 1000 points on each thin section  
271 (Hutchison, 1974) using a Pelcon automatic point counter, attached to a Leica (DM LSP)  
272 optical microscope. This point counter comprises a stepping frame attached to a control box  
273 (power supply) and is also connected to a computer for statistical analyses using Pelcon  
274 software version 2. The point counting and mineral identification was made using an  
275 objective working distance of 1.52 mm. The line section pre-set step-length was 0.3 mm and  
276 the line section distance was 1.5–2 mm. The point counting permitted a detailed quantitative  
277 analysis of the mineralogy of the Sparta fault scarp surface. This detailed mineralogy was  
278 then compared with the chemical composition data to determine whether phases other than  
279 the host limestone are present.

280

### 281 **3.4 Hanging wall soil chemistry and pH**

282 Soil chemistry and pH were measured in samples taken at ~10 cm intervals to a depth of ~90  
283 cm in the pit excavated at the base of the Sparta fault scarp (Fig. 1c). The elemental analysis  
284 was again done with the handheld XRF device. Indicator strips were used to measure pH



285 from mixtures of 1:1 mass ratio of soil:distilled water, and soil:1 M KCl (Sikora and Moore,  
286 2014). These analyses help determine the vertical distribution of REY in the soil (using  
287 yttrium as a proxy) and indicate how they might correlate with pH and the vertical  
288 distribution of REY in the fault scarp below the soil surface.

289

## 290 **4 Results**

291

### 292 **4.1 Sparta fault $^{36}\text{Cl}$ concentrations**

293 The cosmogenic nuclide  $^{36}\text{Cl}$  concentrations from our three profiles (Table S1) and the  
294 original Benedetti et al. (2002)  $^{36}\text{Cl}$  concentrations are compared in Figure 2. The lowest  $^{36}\text{Cl}$   
295 concentrations occur in **our drill-core samples**. Whereas age reversals are non-apparent in this  
296 profile, comprised of widely dispersed sample points, there is a clear decrease in  $^{36}\text{Cl}$  with  
297 depth, including below the soil surface. Our 2.0 m- and 3.9 m-long profiles display  
298 corresponding trends with increasing concentrations with increasing height on the fault scarp.  
299 Only at 1.6 m do the trends strongly deviate from each other. The 2.0 m-long profile indicates  
300 generally lower  $^{36}\text{Cl}$  concentrations including six of 19 points that do not overlap within  
301 uncertainty of data points at corresponding elevations on the 3.9 m-long profile. Four of those  
302 points are located from 1.0 m to 1.3 m. In comparison with our 3.9 m-long profile, the  
303 adjacent segment of the Benedetti et al. (2002) profile shows  $^{36}\text{Cl}$  concentrations that are on  
304 average 19% higher (0-4 m). Uncertainties ( $1\sigma$ ) for data points comprising each profile are  
305 almost identical, displaying a mean of 3.8% for the Benedetti et al. (2002) profile versus  
306 3.9% for our 3.9 m-long and 2.0 m-long profiles. However, the Benedetti et al. (2002) profile  
307 displays more variation between adjacent sample points than is evident in our profiles.

308 **Whereas concentrations differ between the three longest profiles**, they show a consistent

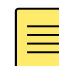

309 gradient up to ~4 m on the scarp face equivalent to an average uplift rate of 1.0–1.3 mm yr<sup>-1</sup>.



310 Above 4 m on the scarp, both our drill-core profile and the Benedetti et al. (2002) profile  
311 display matching lower gradients, which indicates a lower average uplift rate of 0.6–0.9 mm  
312 yr<sup>-1</sup>. If uplift rates are alternatively calculated as occurring prior to the subaerial exposure of  
313 the lowermost samples by the most recent earthquake, cumulative uplift rates increase to 2.8  
314 mm yr<sup>-1</sup> and 1.8 mm yr<sup>-1</sup> for the lower parts of the 3.9 m-long and Benedetti et al. (2002)  
315 profiles, respectively. Both our 2.0 m-long and 3.9 m-long profiles indicate a local low in  
316 <sup>36</sup>Cl concentration at ~0.5 m above the ground surface, which is opposite to the Benedetti et  
317 al. (2002) profile, where concentrations reach a local high at ~0.5 m. Both of our profiles also  
318 display an age reversal at 1.4–1.6 m, which is comparable to the age reversal at 1.2–1.5 m on  
319 the Benedetti et al. (2002) profile. Our 3.9 m-long profile and the Benedetti et al. (2002)  
320 profile each display additional age reversals at 2.6–2.7 m and 3.1–3.2 m on the scarp.  
321 Another reversal is also apparent at 3.7–3.9 m in both profiles (including the drill-core  
322 sample at 4 m). These reversals complement the gradients in being similarities shared by the  
323 profiles that are key characteristics for a further analysis of its paleoseismicity using the  
324 model of Schlagenhauf et al. (2010).

325

326 Using the Schlagenhauf et al. (2010) model, we analyze the number, ages, and magnitudes of  
327 earthquakes inferred from a composite <sup>36</sup>Cl concentration profile; principally this record  
328 contains the 3.9 m profile, but also includes the subsurface samples from our drill-core  
329 profile, and the drill-core samples from 4.1 to 6.4 m (Fig. 3a). The total length of this record  
330 then becomes 7.2 m. To match these two data sets, we increase the concentration of each drill  
331 core sample by 5%. Integrating these two data sets is necessary to generating fits to the <sup>36</sup>Cl  
332 data because subsurface data are required by the Schlagenhauf et al. (2010) model. The 5% is  
333 chosen to match the <sup>36</sup>Cl concentrations in the four drill core samples between 0.8 m and 2.4  
334 m with those in the corresponding segments of the 2.0 m and 3.9 m profiles, while



335 maintaining subsurface  $^{36}\text{Cl}$  concentrations below those in the samples at 0.1 m on the 2.0 m  
336 and 3.9 m profiles. Then, using the same parameters that generated the best model fit to the  
337 3.9 m-long plus drill-core profile (Table 1), we apply the best model fit to our 2.0 m-long  
338 profile (Fig. 3b) and the Benedetti et al. (2002) profile (Fig. 3c). In both cases, we use the  
339 adjusted subsurface data from the drill-core profile. For our 2.0 m plus subsurface drill core  
340 profile, we used the scarp mineralogy measured for each sample. For the 3.9 m-long plus drill  
341 core profile and the Benedetti et al. (2002) plus subsurface drill core profile **we used a mean**  
342 **composition from our measured scarp mineralogy** because we did not determine mineralogies  
343 along these profiles. We further compare earthquakes modelled from age reversals in the  $^{36}\text{Cl}$   
344 data with earthquakes modelled from potential soil profiles mirrored in scarp geochemistry  
345 (REY,  $\text{SiO}_2$  and  $\text{Al}_2\text{O}_3$ ; Fig. 3d). We then use all data to infer the most likely earthquake  
346 history for this segment of the Sparta fault.

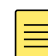

347

348 From the combined 7.2 m-long profile, modelling indicates that five earthquakes at 1.4 m  
349 (2.3 kyr B.P.), 2.6 m (2.8 kyr B.P.), 3.9 m (3.2 kyr B.P.), 5.1 m (3.8 kyr B.P.), and 6.5 m (5.9  
350 kyr B.P.) provide the best statistical fit to our data (Fig. 3a; Table 1). Our best fit parameters,  
351 taken either directly from field measurement or assumed (in the case of  $\epsilon$  and pre-exposure),  
352 are listed in Table 1. The two inferred earthquakes at 1.4 m (2.3 kyr B.P.) and 2.6 m (2.8 kyr  
353 B.P.) also provide a good statistical fit to our 2.0 m-long profile (Fig. 3b). An inferred five  
354 earthquakes on the Benedetti et al. (2002) profile (Fig. 3c) at the same elevations on the scarp  
355 as our adjacent composite profile (Fig. 3a) display a statistically weaker fit than obtained for  
356 our data (Table 1). Older ages and longer exposure prior to the oldest earthquake (pre-  
357 exposure) are necessitated by the systematically higher  $^{36}\text{Cl}$  concentrations. Earthquakes  
358 inferred from the record of scarp geochemistry (Section 4.3) occur at 0.8 m (1.9 kyr B.P.), 2.6  
359 m (2.8 kyr B.P.), 4.0 m (3.0 kyr B.P.), and at 6.4 m (5.9 kyr B.P.) on our 7.2 m-long profile



360 (Fig. 3d). Interestingly, this reconstruction has a statistically weaker fit than for earthquakes  
361 inferred from reversals in  $^{36}\text{Cl}$  concentrations (Fig. 3a; Table 1). We note that for the  
362 applicable  $^{36}\text{Cl}$  concentration profiles, model fits overestimate  $^{36}\text{Cl}$  concentrations at 4 m on  
363 the scarp surface (Figs. 3a, c, and d). In Figure 3a, c, and d, an (artificial) earthquake is added  
364 to the top of the  $^{36}\text{Cl}$  concentration profile to fit all data (Earthquake 1, shown in grey).  
365 Because this oldest earthquake is tied to the highest sample on the scarp, without an  
366 associated age reversal, and because  $^{36}\text{Cl}$  measurements are sparsely spaced above 4 m, the  
367 inferred locations on the fault scarp and timing of this earthquake are approximate. We  
368 therefore focus our interpretations on the inferred earthquakes lower down on the fault scarp.  
369

370 The model fit to our data is sensitive to input parameters, at least two of which are difficult to  
371 accurately measure (Fig. 4). It is most sensitive to the scarp dip angle (e.g., a  $5^\circ$  decrease  
372 causes the AICc to increase by 12%), followed by the density of colluvium mantling the  
373 hanging wall and the rate of scarp surface erosion. It is least sensitive to variations in rock  
374 density and hillslope gradient. The colluvium density depends on relative abundances of  
375 limestone clasts, mineral soil, organic matter, and water, which vary spatially. Due to, for  
376 example, wetting and drying, colluvium density is expected to also vary temporally. Scarp  
377 erosion rates remain undetermined. The adopted values for colluvium density and scarp  
378 erosion rate are, therefore, those which provide the best model fits to the data. In both cases,  
379 those values are also realistic (Table 1). Rock density is prescribed from the literature and  
380 colluvium dip, scarp dip, and hillslope gradient are based on measurements. Optimal  
381 colluvium and scarp dips are adjusted slightly relative to measured values (i.e.,  $1\text{--}2^\circ$ , which is  
382 within measurement uncertainty).

383

#### 384 **4.2 Granulometry of the Sparta fault scarp surface**



385 A first look at the Sparta fault scarp surface yields a misleading impression of homogeneous  
386 limestone (Figs. 1, 5a), whereas close inspection of the core samples instead reveals a typical  
387 fault breccia (Figs. 5b-d). This breccia consists of angular-to-rounded limestone clasts with  
388 axes of 1–7 mm (in the two-dimensional view provided by thin sections) surrounded by  
389 matrix/cement in which clasts are <0.1 mm in length. The fault breccia is defined as a  
390 protocataclasite, according to the classification of Woodcock and Mort (2008). The  
391 composition of the protocataclasite displays large spatial variations, with some portions  
392 containing abundant clasts (Fig. 5c), whereas others are dominated by fine matrix (Fig. 5d).  
393 The proportion of clasts >2 mm ranges from 5% to 20% vertically along the fault scarp and  
394 the proportion of matrix ranges from 5% to 60%. We did not measure the thickness of the  
395 protocataclasite but it everywhere exceeds the 4 cm depth of our drill cores.

396

### 397 **4.3 Sparta fault scarp composition and mineralogy**

398 In addition to a spatially variable granulometry, the fault scarp shows a spatially variable  
399 distribution of major and trace elements. The major component is, as expected for limestone,  
400 CaO (mean 52.22%) but its concentration varies between 43.83% and 56.64% (Table S2),  
401 which exceeds spatial variations in CaO seen elsewhere in limestone normal fault scarps  
402 (Carcaillet et al., 2008; Tesson et al., 2016). Quartz (SiO<sub>2</sub>) also occurs, and it too displays  
403 spatial variations (0.10%–20.82%), with broad peaks occurring at -0.5– -0.4 m, 0.9–1.2 m,  
404 4.6–4.8 m, and 6.0–6.2 m along the vertical fault scarp profile (Fig. 6; Table S2). An  
405 additional peak in SiO<sub>2</sub>, but which is not seen in point counting of quartz, occurs at 6.2 m  
406 (Fig. 6; Tables S2 and S3). Mean concentrations of other major elements are low in bulk  
407 samples, including Al<sub>2</sub>O<sub>3</sub> (0.21%), MgO (0.16%), Fe<sub>2</sub>O<sub>3</sub> (0.09%), P<sub>2</sub>O<sub>5</sub> (0.07%), and K<sub>2</sub>O  
408 (0.05%; Table S2). However, EDS measurements, such as shown in Figure 7a, reveal that the  
409 concentrations of some elements are frequently much higher in intergranular pores (Fig. 7c)





410 than elsewhere in the fault scarp, including  $\text{Si} \leq 38.3\%$ ,  $\text{Al} \leq 11.7\%$ ,  $\text{Fe} \leq 48.4\%$ , and  $\text{K} \leq$   
411  $7.1\%$  (Table S4). Furthermore, intergranular pores and quartz frequently occur together (Fig.  
412 7b) and the concentration of  $\text{Al}_2\text{O}_3$  covaries with the much more abundant quartz ( $\text{SiO}_2$ ) (Fig.  
413 6).

414

415 Quartz is revealed by microscopy to be present as randomly oriented rounded-to-angular  
416 grains that are  $<50 \mu\text{m}$  in diameter (Figs. 5d, 7b). Quartz is a constituent of the  
417 protocataclastic fine matrix that is mostly comprised of microcrystalline calcite precipitates  
418 and which cements larger host rock-derived  $\text{CaCO}_3$  clasts (Figs. 5b-d, 7b, 8a). Point counting  
419 further reveals quartz modes ranging from 0.1% to 15.4% of thin section area (Table S3),  
420 with higher abundances correlating to higher abundances of fine matrix. The spatial  
421 correlations between  $\text{SiO}_2$ , quartz abundances on point counting, and fine matrix are further  
422 indicated by the EDS spot elemental analysis (Fig. 8). Here, the two selected spots in the fine  
423 matrix display Si abundances of 29.7% and 28.9%, which contrasts with 1.7% and 0.9% for  
424 the two spots located on clasts. CaO abundances display an inverse relationship with  $\text{SiO}_2$   
425 (33.7% and 31.2% for the clasts versus 4.8% and 5.1% for the fine matrix).  $\text{SiO}_2$  is present  
426 largely as quartz, as evidenced by the strong spatial correlation between quartz and  $\text{SiO}_2$   
427 along the vertical profile (Fig. 6). Quartz can therefore be used as a proxy for fine matrix  
428 abundances in the Sparta fault scarp.

429

430 In addition to the spatial relationship between quartz and fine matrix, we observed in  
431 backscatter SEM images that pore spaces, which frequently harbor higher concentrations of  
432 Si, Al, K and/or Fe than host rock-derived clasts, are also more abundant in the fine matrix  
433 (Fig. 7c). These observations provide evidence that clay particles ( $< \mu\text{m}$ -scale) frequently



434 coat pore spaces. The abundance of quartz therefore also provides a proxy for the abundance  
435 of clay-coated pore spaces.

436

437 Concentrations of yttrium are generally low (1.2–11.1 ppm; Table S5) but vary in a wave-like  
438 pattern along the vertical profile, with maxima occurring at -0.4 m, 0.8 m, 2.6 m, 4.0 m, and  
439 6.4 m (Fig. 9). These maxima do not systematically decrease with vertical distance above the  
440 hanging wall and are not highest in the soil-mantled portion of the scarp. Yttrium (mean 6.3  
441 ppm), La (mean 5.04 ppm), Nd (mean 3.54 ppm), and Ce (mean 2.31 ppm) have the highest  
442 concentrations, whereas all other REY are <1 ppm (Table S5). The concentrations of REY  
443 elements co-vary vertically along the scarp surface ( $R^2 = 0.95$ ; Fig. 9), the proportion of  
444 light-REY (LREY) to heavy-REY (HREY) remains constant (ratio ~7:1; Fig. 10; Table S5),  
445 and concentration maxima occur at locations that correspond closely with the  $Al_2O_3$  maxima  
446 (Fig. 9; Table S5). Accordingly, there is a strong correlation between REY and  $Al_2O_3$  ( $R^2 =$   
447  $0.92$ ; Fig. S2a). Spatial correlations between REY and  $SiO_2$  and  $K_2O$  are also observed ( $R^2 =$   
448  $0.56$  and  $0.87$ , respectively; Fig. S2c, e). In contrast, the locations of REY maxima correlate  
449 neither with the location of the present ground surface (-0.4 m) nor former ground surfaces at  
450 1.4 m and 5.1 m inferred from  $^{36}Cl$  data. There are, however, correlations between REY  
451 maxima and former ground surfaces at 2.6 m, 3.9–4.0 m, and at 6.4–6.5 m modelled from the  
452  $^{36}Cl$  data. No systematic relationship is therefore apparent between REY maxima and either  
453 the present soil surface or former soil surfaces inferred from inflection points in  $^{36}Cl$   
454 concentrations.

455

#### 456 **4.4 Hanging wall soil chemistry and pH**

457 The terra rosa soil mantling the hanging wall primarily comprises aeolian dust (Muhs et al.,  
458 2010) and carbonate clasts. At our sample site, the soil thickness at the base of the Sparta



459 fault scarp is 0.8 m and this appears to be stable, at least over the timescale of scarp surface  
460 dissolution, as evidenced by a much smoother scarp surface texture below the soil surface  
461 compared with the subaerially exposed scarp. Below the organic horizon (~0.1 m thick) the  
462 soil is welded, probably by calcite precipitates, and horizons are absent. Soil pH is, in  
463 general, slightly acidic along the excavated vertical profile, remaining within a 6.2 to 7.0  
464 range (Fig. 11a; Table S6). An outlier occurs at -0.30 m, where the pH is  $5.6 \pm 0.2$ . Soil  
465 composition varies with depth (Fig. 11b; Table S7). Concentrations of Si, Al, and K are lower  
466 in the organic horizon (11%, 0–5%, and 0.4%, respectively) compared with the remainder of  
467 the profile (18%–30%, 5–10%, and 0.5–0.9%, respectively), whereas the concentrations of  
468 LE, which includes C, are, as expected, higher in the organic horizon (75%–80%) than in the  
469 lower profile segment (51%–64%). The concentration of yttrium ranges from a maximum of  
470 36–39 ppm at -0.5– -0.6 m depth to a minimum of 11 ppm at -0.1 m depth and its vertical  
471 distribution correlates positively with Si ( $R^2 = 0.71$ ), Al ( $R^2 = 0.45$ ), and K ( $R^2 = 0.54$ ), but  
472 negatively with pH ( $R^2 = -0.52$ ; Figs. 11c, S1b,d,f; Table S7).

473

## 474 **5 Discussion**

475

### 476 **5.1. Modelling of earthquakes from $^{36}\text{Cl}$ concentration profiles**

477 Our modelling using Schlagenhauf et al. (2010) indicates that five earthquakes provide a best  
478 fit to the Sparta fault  $^{36}\text{Cl}$  data. The youngest inferred earthquake (2.3 kyr B.P.) corresponds  
479 both with the historical 464 B.C.E. event and inflections in the  $^{36}\text{Cl}$  data of the 2.0 m-long  
480 and 3.9 m-long profiles. The penultimate inferred earthquake at 2.8 kyr B.P. correlates to an  
481 inflection in  $^{36}\text{Cl}$  concentration at 2.6 m in our 3.9 m-long profile. Because data density  
482 decreases above 4.0 m, there are no clear inflections in  $^{36}\text{Cl}$  concentrations to base the  
483 occurrence of earthquakes on for this segment of the scarp. However, fitting the



484 Schlagenhauf et al. (2010) model to the measured gradient in  $^{36}\text{Cl}$  concentrations yields an  
485 additional record of three older earthquakes at 3.2 kyr B.P., 3.8 kyr B.P., and 5.9 kyr B.P. to  
486 explain the exhumation of the exposed scarp surface. The four most recent earthquakes are  
487 clustered within a 1.5 kyr period, whereas nearly 2.5 kyr have elapsed since the last  
488 earthquake on the Sparta fault. A lower gradient in  $^{36}\text{Cl}$  concentration on the fault scarp  
489 above the location of the inferred 3.2 kyr B.P. earthquake also indicates a lower rate of scarp  
490 exhumation prior to the 1.5 kyr period of apparently higher earthquake activity. The long  
491 recent quiescent interval therefore does not necessarily provide evidence that another (large  
492 magnitude) earthquake may be imminent. As a comparison, extensional faults in the central  
493 Italian Apennines accumulate meters of displacement over several thousands of years, but  
494 also display similar length periods where cumulative slip magnitudes are much lower,  
495 because earthquake activity shifts between faults across-strike (Cowie et al., 2017). The same  
496 may also apply to the Sparta fault and related extensional faults in the region.

497

498 The precision at which we can interpret paleoseismicity is constrained by three factors. These  
499 include (i) sparse  $^{36}\text{Cl}$  data above 4.0 m on the Sparta fault scarp, (ii) uncertainties in scarp  
500 erosion rate, pre-exposure length, and hanging wall surface dip angle and colluvium density  
501 (Fig. 4), and (iii) fault scarp impurities that produce noise in the  $^{36}\text{Cl}$  data and distortion of  
502 potential REY indicators of former soil surfaces. Below, we will explore methodological and  
503 geological sources of uncertainty in the  $^{36}\text{Cl}$  data, reasons for mineralogical impurities in the  
504 Sparta fault scarp, and how the observed REY distribution can be interpreted. This will be  
505 achieved by comparing the 2.0 m-long profile with the equivalent segment of the 3.9 m-long  
506 profile because both profiles have been sampled, processed, and analyzed in the same manner  
507 and at the same time, and therefore provide a measure of repeatability.

508



509 **5.2 Methodological and geological sources of uncertainty in the  $^{36}\text{Cl}$  data**

510 A peculiar feature of the  $^{36}\text{Cl}$  data is that the profile comprised of small drill-core samples  
511 generally yields younger exposure ages for the Sparta fault scarp than the 2.0 m- and 3.9 m-  
512 long profiles, which, in turn, are systematically younger than the Benedetti et al. (2002)  
513 profile (Fig. 2). The Benedetti et al. (2002) profile displays variations between adjacent  
514 sample points that exceed those observed in our profiles and rival variations in  $^{36}\text{Cl}$   
515 concentrations that may be attributable to earthquakes. We interpret the systematic  
516 differences in  $^{36}\text{Cl}$  concentration between the drill-core profile, the 2.0 m and 3.9 m profiles,  
517 and the Benedetti et al. (2002) profile as reflecting methodological differences related to  
518 advances in sample preparation chemistry at PRIME-Lab, Purdue University. Similarly, the  
519 reason why we can directly infer the 464 B.C.E earthquake at Anogia, in contrast to Benedetti  
520 et al. (2002), is attributable to advances in age calculations from  $^{36}\text{Cl}$  concentrations.

521

522 Whereas our 2.0 m- and 3.9 m-long profiles display corresponding trends with increasing  
523 elevation on the fault scarp, the 2.0 m profile has generally lower  $^{36}\text{Cl}$  concentrations (Fig. 2).  
524 Indeed, six of its 19  $^{36}\text{Cl}$  concentrations do not overlap within uncertainty with concentrations  
525 of corresponding samples on the 3.9 m profile, including four points located between 1.0 m  
526 and 1.3 m. We interpret these differences as indicating that the fault scarp of the 2.0 m profile  
527 has been either partly shielded from cosmogenic radiation, has eroded more than the surface  
528 of the 3.9 m profile, or contains a higher concentration of impurities. Of potential additional  
529 relevance is that the texture of the scarp surface at the location of the 2.0 m profile is  
530 smoother than at the location of the 3.9 m profile. Because a similarly smooth texture also  
531 characterizes the scarp surface presently buried by colluvium mantling the hanging wall, the  
532 smooth texture at the location of the 2.0 m profile may indicate either recent burial of the  
533 scarp surface by colluvium and/or  $\text{CaCO}_3$  dissolution occurring at a higher rate than at



534 locations where the exposed scarp surface texture is rougher. If a smooth texture reflects  
535 erosion through  $\text{CaCO}_3$  dissolution, there might be preferential flow, or seepage, of water  
536 from the hillslope above the scarp at the location of the 2.0 m profile. Observed lumps of  
537 colluvium cemented to the Sparta fault scarp, at locations perched above the present hanging  
538 wall surface (Fig. S1) partially shield the underlying scarp surface. However, had this  
539 previously occurred at the location of our 2.0 m profile, an eroded colluvial lump would be  
540 evidenced in the hanging wall sediments. On the contrary, there is no colluvial lump, but  
541 rather a sub-horizontal surface is present with an expression that differs little from the surface  
542 below the 3.9 m profile. The inter-profile differences in  $^{36}\text{Cl}$  concentrations illustrate the  
543 value in taking samples for  $^{36}\text{Cl}$  measurements from more than one vertical profile, because  
544 evidence of past shielding by sediments or bedrock can otherwise be difficult, at best, to  
545 detect. Partial shielding may impact the interpretation of the number of paleoearthquakes and  
546 result in lower age estimates of earthquakes, with a corresponding decrease in recurrence  
547 intervals.

548

### 549 **5.3. The effects of mineralogical impurities on $^{36}\text{Cl}$ concentration profiles**

550 Mineralogical impurities embedded in the fault breccia that comprises the scarp surface  
551 appear to be a key geological reason for spatial variations in the concentration of  $^{36}\text{Cl}$ . This  
552 effect is best evidenced when comparing modelled  $^{36}\text{Cl}$  concentrations for the 2.0 m-long  
553 profile (Fig. 3b), including measured mineralogy for each sample location, with modelled  
554  $^{36}\text{Cl}$  concentrations for the 3.9 m-long and Benedetti et al. (2002) profiles, including mean  
555 values of the scarp composition derived from our measured data (Fig. 3a, c, d). Whereas the  
556 latter modelled profiles appear smooth, the modelled 2.0 m profile contains inter-sample  
557 noise, which reflects variations in calcite abundance, attributable to the additional, and  
558 variable, presence of quartz and other minerals, including trace amounts of clay lining pores



559 (Figs. 5–9). Because  $^{36}\text{Cl}$  is also produced by spallation on K ( $162 \pm 24$  atoms  $\text{g}^{-1} \text{yr}^{-1}$  at  
560 SLHL; Evans et al., 1997), Fe ( $1.9 \pm 0.2$  atoms  $\text{g}^{-1} \text{yr}^{-1}$  at SLHL; Stone, 2005), and Ti ( $13 \pm 3$   
561 atoms  $\text{g}^{-1} \text{yr}^{-1}$  at SLHL; Fink et al., 2000), noise in the  $^{36}\text{Cl}$  data might also partly reflect the  
562 relative abundances of these elements. However, for the case of the Sparta fault, this appears  
563 to be insignificant given that measured concentrations of these elements are extremely low  
564 (concentrations of  $\text{K}_2\text{O}$ ,  $\text{Fe}_2\text{O}_3$ , and  $\text{TiO}_2$  are 0–0.12%, 0.03–0.24%, and 0–0.02%,  
565 respectively; Fig. S3, Table S2).

566

567 Mineralogical impurities may also explain two other enigmatic features in the  $^{36}\text{Cl}$  data.

568 Firstly, an apparent age reversal occurs at 3.1 m in the 3.9 m-long profile (Fig. 3a). Although  
569 this could indicate the location of a former soil horizon and thus inferred displacement by an  
570 earthquake, a better model fit is gained by locating an earthquake higher up the scarp at 3.9  
571 m. Secondly,  $^{36}\text{Cl}$  concentrations at ~4 m in the 3.9 m profile and the Benedetti et al. (2002)  
572 data (3.8–4.1 m, Fig. 3a; 3.7–4.3 m, Fig. 3c) are too low to overlap within uncertainty with  
573 concentrations modeled using Schlagenhauf et al. (2010). A possible explanation for both  
574 enigmatic features is an inability to fully capture the effects of mineralogical impurities on  
575  $^{36}\text{Cl}$  production rates. This is largely because, in the absence of mineralogical data for these  
576 profiles, we have calculated a mean composition based on the mineralogical data for the 2.0  
577 m profile to model  $^{36}\text{Cl}$  concentrations. However, even with the mineralogical data, current  
578 laboratory techniques for preparing samples for  $^{36}\text{Cl}$  measurement may not record  
579 mineralogical variations at sufficient precision. In addition to highlighting the importance of  
580 mineralogical analyses, we also highlight the value of using a model to identify the likely  
581 displacements by paleoearthquakes through fitting model  $^{36}\text{Cl}$  concentration profiles to real  
582 ones, rather than overtly relying on apparent age reversals. It remains possible that two



583 earthquakes occurred in close succession, but with this data and methodology, we cannot

584 confidently infer both of those.

585

#### 586 **5.4. Estimated magnitude of the 464 B.C.E. earthquake**

587 The 464 B.C.E. earthquake that destroyed Sparta had an estimated moment ( $M_o$ ) of  $1 - 4$  (x

588  $10^{19}$ ) N m. This is derived from multiplying the vertical displacement of 1.4 m (Fig. 3a-c)

589 with fault dimensions of  $20 \times 14$  km –  $64 \times 14$  km, and with a shear modulus of  $3.23 \times 10^{10}$  N

590  $\text{m}^{-2}$  (Armijo et al., 1991). The values of 20 km, 14 km, and the shear modulus are from

591 Armijo et al. (1991) and 64 km is the mapped length of the Sparta fault in Figure 1. This

592 estimated range of  $M_o$  values straddles a previous “most probable” estimate of moment by

593 Armijo et al. (1991) of  $3 \times 10^{19}$  N m even though they lacked field constraints on fault slip

594 distance during the Sparta Earthquake. Hence, we conclude from this congruence of the

595 probable value with values based on the vertical displacement modelled from the  $^{36}\text{Cl}$  data

596 (Fig. 3), that they are reliable. From the empirically derived equations of Pavlides and Caputo

597 (2004) and a vertical displacement of 1.4 m of the Sparta fault, we calculate a magnitude ( $M_s$ )

598 of 6.8-7.2 for the 464 B.C.E. earthquake. Given the severe destruction inflicted upon the

599 Spartan society (REF?), we consider that the upper estimate is most likely. A magnitude 7.2

600 earthquake is also in agreement with the estimate by Armijo et al. (1991), although they

601 based this on ~10 m of vertical displacement. We are less certain of the magnitudes and

602 timing of older earthquakes. However, it appears that the Sparta fault was exhumed by a

603 series of similarly large earthquakes over a period of about 3.5 kyr.

604

#### 605 **5.4. Interpretation of REY distributions**

606 REY cannot be used to infer imprints of former soil profiles on the Sparta fault at Anogia.

607 Petrographic analyses indicate that the Sparta fault scarp is composed of a protocataclasite





608 consisting of calcite clasts derived from the host limestone, microcrystalline calcite cement,  
609 and quartz (Figs. 5, 6). Furthermore, EDS analysis indicates that trace amounts of clay, such  
610 as illite, are lining pores where microcrystalline calcite cement and quartz are located (Fig. 7;  
611 Carcaillet et al., 2008). Given the correlations between REY and each of Al, K, and Si ( $R^2 =$   
612 0.92, 0.87, and 0.56, respectively; Fig. S2a-c), we infer that the clays embedded in the fault  
613 scarp are hosting REY. This is a likely explanation for why REY peaks 0.4 m below the  
614 current soil surface (Fig. 9), rather than at the soil surface as has been observed on the  
615 Magnola fault in Italy (Manighetti et al., 2010).

616

617 The formation of protocataclasite occurs beneath the Earth's surface at depths that may range  
618 from meters to up to thousands of meters. A model for this involves fluids moving along the  
619 Sparta fault, primarily associated with seismic events. These fluids dissolve  $\text{CaCO}_3$  from the  
620 host-limestones and potentially also silicate minerals from psammitic and pelitic  
621 (meta)sediments, where they are dissected by the fault. In association with variations in  
622 temperature and pressure along the fault, chemical saturation of these fluids results in  
623 precipitation of clay, quartz, and microcrystalline calcite, which cements clasts of host-rock  
624 derived limestone into the fault breccia. Subsequent faulting re-fractures the breccia and  
625 particle comminution over time produces quartz grains that are rounded-to-angular in shape,  
626 randomly oriented, and  $<50 \mu\text{m}$  (Figs. 5, 7). The fault breccia may also have undergone  
627 multiple generations of microcrystalline calcite re-cementing from re-circulating fluids. As an  
628 alternative to a dissolution-precipitation model, clay and quartz emplacement may involve  
629 fluid entrainment of particles and grains from clay- and quartz-bearing sedimentary units  
630 during faulting, as has been observed elsewhere (e.g., Darwin, 1840; Roy, 1946; Brandon,  
631 1972; Röshoff and Cosgrove, 2002). This process may also be accompanied by comminution  
632 of fault-zone quartz grains derived from psammitic rocks. We tentatively exclude a



633 contemporary aeolian source for the clay and quartz because there is no documented  
634 mechanism to transport clay particles and quartz grains from the soil to centimeters into a  
635 fault scarp. We cannot distinguish soil to scarp clay and quartz migrations on the Sparta fault  
636 which has been observed, for example, at the micrometer scale in surface coatings on the  
637 Magnola fault, because that scarp is comprised of pure carbonate (Carcaillet et al., 2008). It is  
638 likely that limestone fault scarps are generally composed of fault breccias (Agosta and Aydin,  
639 2006; Carcaillet et al., 2008; Nuriel et al., 2012) and that where a fault intersects varying  
640 lithologies, chemical and mineralogical heterogeneities may occur in the fault breccia, as  
641 observed on the Sparta fault. Where they occur, these heterogeneities may control the spatial  
642 distribution of REY, independent of any spatial reorganization of REY attributable to  
643 subaerial weathering.

644

645 REY correlates with inferred clay abundances on the Sparta fault scarp (Fig. 9), rather than  
646 systematically with former soil profiles inferred from  $^{36}\text{Cl}$  concentrations. A correlation of  
647 REY with Si and Al is indeed observed in the soils mantling the Sparta ( $R^2 = 0.71$  and  $0.45$ ,  
648 respectively; Figs. 11c and S2b,c), Kaparelli ( $R^2 = 0.95$  for Si; Figs. 1a and S4a), and  
649 Magnola fault hanging walls ( $R^2 = 0.98$  for both Si and Al; Fig. S4b,c and electronic  
650 appendix to Manighetti et al., 2010). These correlations generally contrast with a weaker  
651 negative correlation between Y and pH ( $R^2 = 0.52$ ) for the hanging wall soil on the Sparta  
652 Fault (Fig. 11c). We propose a causative relationship between the vertical distributions of  
653 REY and clay on the Sparta fault scarp. The presence of clay likely relates to fault breccia  
654 formation at considerable depths beneath the Earth's surface, rather than subaerial weathering  
655 processes. This reasoning is supported by the following observations:

- 656 (i) The Sparta fault scarp REY concentrations are equivalent to (Nuriel et al., 2012;  
657 Goodfellow et al., 2017) or higher than those measured elsewhere in platformal



658 limestone (Carcaillet et al., 2008; Mouslopoulou et al., 2011), but yttrium  
659 concentrations are lower than in the adjacent hanging wall soil (rare-earth elements  
660 were not measured; Tables S5, S7).

661 (ii) If REY exchange between the soil and fault scarp occurs according to the Carcaillet  
662 et al. (2008) model, fractionation of LREY and HREY elements is expected. For  
663 example, LREY might be preferentially mobilized (Takahashi et al., 2005;  
664 Carcaillet et al., 2008), leading to an enrichment of LREY relative to HREY in the  
665 fault scarp, where there are peaks in total REY. Conversely, LREY may be depleted  
666 relative to HREY where there are troughs in total REY. However, the proportion of  
667 LREY to HREY remains constant vertically along the Sparta fault scarp (Fig. 10).

668 (iii) There is no systematic decrease in total REY along the vertical scarp profile (Fig.  
669 9), in contrast to declining concentrations with distance above the hanging wall on  
670 the Magnola fault (Carcaillet et al., 2008).

671 Whereas these observations discount subaerial weathering as the dominant mechanism for  
672 REY enrichment and depletion on the Sparta fault, there may be some weathering-induced  
673 exchange. This is evidenced by the peak in REY on the buried Sparta fault scarp correlating  
674 with the peak in soil acidity (Figs. 9, 11a, b), but which notably occurs in the subsurface,  
675 rather than at the soil surface. If, as we infer, the spatial patterning of REY, quartz, and clay  
676 (as indicated by Al) is inherited from depth, the observed wave-like signal (Figs. 6, 9) may  
677 reflect sorting and cementing of breccia around surface asperities on the fault plane. The  
678 resulting infilling of depressions with fault gouge may create a successively more polished  
679 and localized fault plane along which friction is lowered, thereby permitting larger slip (i.e.,  
680 larger earthquakes) along the fault (Sagy and Brodsky, 2009). Whereas REY concentrations  
681 do not appear to be a reliable indicator of Holocene paleoseismicity along the Sparta fault,  
682 they may instead reveal processes that localize slip to a discrete fault plane.



683

## 684 **6 Conclusion**

685

686 In applying cosmogenic  $^{36}\text{Cl}$  exposure-age dating and rare-earth elements and yttrium (REY)  
687 measurements to unravelling the paleoseismic history of the Sparta fault, Greece, we  
688 conclude the following: Modeling of  $^{36}\text{Cl}$  concentrations along two vertical profiles on the  
689 Sparta Fault, closely adjacent to a  $^{36}\text{Cl}$  concentration profile previously measured and  
690 interpreted by Benedetti et al. (2002), indicates that the scarp was likely exhumed over 5  
691 earthquakes, including one at  $\sim 2.3 \pm 0.2$  kyr B.P., which correlates with the 464 B.C.E. event.  
692 Four earthquakes were clustered within a 1.5 kyr period that culminated with the 464 B.C.E.  
693 event. Cumulative uplift was as high as  $2.8 \text{ mm yr}^{-1}$  during that period, compared with  $\sim 0.6$ –  
694  $0.9 \text{ mm a}^{-1}$  over the preceding 2.7–4.4 kyr. Because earthquake activity may shift between  
695 faults in extensional settings, a large magnitude earthquake is not necessarily indicated as  
696 being overdue by the  $\sim 2.5$  kyr that have elapsed since the 464 B.C.E. event. More generally,  
697 accurate identification of individual earthquakes is presently constrained by spatial variations  
698 in  $^{36}\text{Cl}$  concentration profiles that reflect neither exposure duration nor imprints of former soil  
699 profiles. In cases where this is attributable to mineralogical variations, such as in the Sparta  
700 fault scarp, present chemical preparation techniques for AMS measurement of  $^{36}\text{Cl}$  may  
701 insufficiently account for those variations.

702

703 The Sparta fault scarp is impure; it is composed of fault breccia, which contains quartz and  
704 clay-lined pores in addition to calcite. The vertical distribution of REY is highly correlated  
705 with the pore-clay and may indicate processes of fault evolution deep below the ground  
706 surface. The potential exchange of REY between the hanging wall colluvium and the adjacent  
707 footwall scarp is overwhelmed at this site by REY attached to the pore clays inherited from

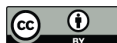

708 depth. Because of this, Holocene earthquakes and their slip distances and magnitudes cannot  
709 be inferred for the Sparta fault from REY concentrations. This is probably true also for  
710 similar impure limestone fault scarps elsewhere.

#### 711 **Author contribution**

712 AS conceived the study and AS, APS, MWC, RF, and BWG participated in fieldwork. RF  
713 conducted the analysis of scarp composition, made initial interpretations, and compiled an  
714 initial manuscript as a part of research studies at Stockholm University. BWG made  
715 additional analyses, including earthquake modelling, and led writing of this manuscript. GC  
716 led the laboratory preparation of samples for  $^{36}\text{Cl}$  measurement, in which BWG also  
717 participated. GC calculated  $^{36}\text{Cl}$  concentrations from the AMS data. All authors contributed  
718 to data interpretation and manuscript editing.

719

#### 720 **Competing interests**

721 Arjen P. Stroeven is a member of the editorial board for Solid Earth.

722

#### 723 **Acknowledgements**

724 We thank Mikael Amlert for his assistance with field safety and sampling, Giorgos Maneas,  
725 station manager of the Navarino Environmental Observatory (NEO), for his extensive  
726 assistance with field logistics, and our deceased friend, Dan Zetterberg, Department of  
727 Geological Sciences, Stockholm University, for his assistance with thin section preparations.  
728 This project was funded by the Stockholm University Research School for teachers focusing  
729 on Natural Hazards financed by the Swedish Research Council and by a grant from NEO. We  
730 gratefully acknowledge funding for fieldwork from the Swedish Society for Anthropology  
731 and Geography Andree Fund to Fritzon.

732

#### 733 **References**

- 734 Agosta, F. and Aydin, A.: Architecture and deformation mechanism of a basin bounding  
735 normal fault in Mesozoic platform carbonates, central Italy. *Journal of Structural*  
736 *Geology*, 28, 1445–1467, 2006.
- 737 Armijo, R., Lyon-Caen, H., and Papanastassiou, D.: A possible normal-fault rupture for the  
738 464 BC Sparta earthquake. *Nature*, 351, 137–139, doi: 10.1038/351137a0, 1991.
- 739 Benedetti, L., Finkel, R., Papanastassiou, D., King, G., Armijo, R., Ryerson, F., Farber, D.,  
740 and Flerit, F.: Post-glacial slip history of the Sparta fault (Greece) determined by  $^{36}\text{Cl}$   
741 cosmogenic dating: Evidence for non-periodic earthquakes. *Geophysical Research*  
742 *Letters*, 29, 1246, doi: 10.1029/2001GL014510, 2002.
- 743 Brandon, A.: Clastic dykes in the Namurian shales of County Leitrim, Republic of Ireland.  
744 *Geological Magazine*, 109, 361–67, 1972.
- 745 Carcaillet, J., Manighetti, I., Chauvel, C., Schlagenhauf, A., and Nicole, J.-M.: Identifying  
746 past earthquakes on an active normal fault (Magnola, Italy) from the chemical analysis of  
747 its exhumed carbonate fault plane. *Earth and Planetary Science Letters*, 271, 145–158,  
748 doi: 10.1016/j.epsl.2008.03.059, 2008.
- 749 Cowie, P.A., Phillips, R.J., Roberts, G.P., McCaffrey, K., Zijerveld, L.J.J., Gregory, L.C.,  
750 Faure Walker, J., Wedmore, L.N.J., Dunai, T.J., Binnie, S.A., Freeman, S.P.T.H.,  
751 Wilcken, K., Shanks, R.P., Huisman, R.S., Papanikolaou, I., Michetti, A.M., and  
752 Wilkinson, M.: Orogen-scale uplift in the central Italian Apennines drives episodic  
753 behaviour of earthquake faults. *Scientific Reports* 7, 44858, 2017.

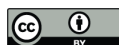

- 754 Darwin, C: Geological observations in the volcanic islands and parts of South America  
755 visited during the voyage of H.M.S. Beagle. London, 1840.
- 756 Dramis, F. and Blumetti, A.M.: Some considerations concerning seismic geomorphology and  
757 paleoseismology. *Tectonophysics*, 408, 177–191, 2005.
- 758 Evans, J.M., Stone, J.O.H., Fifield, L.K., and Cresswell, R.G.: Cosmogenic chlorine-36  
759 production in K-feldspar. *Nuclear Instruments and Methods in Physics Research B*, 123,  
760 334–340, 1997.
- 761 Fink, D., Vogt, S., and Hotchkis, M.: Cross-sections for  $^{36}\text{Cl}$  from Ti at  $E_p = 35\text{--}150$  MeV:  
762 Applications to in-situ exposure dating. *Nuclear Instruments and Methods in Physics  
763 Research B*, 172, 861–866, 2000.
- 764 Godey, S., Bossu, R., and Guilbert, J.: Improving the Mediterranean seismicity picture thanks  
765 to international collaborations. *Physics and Chemistry of the Earth, Parts A/B/C* 63, 3–11,  
766 doi:10.1016/j.pce.2013.04.012, 2013.
- 767 Goodfellow, B.W., Viola, G., Bingen, B., Nuriel, P., and Kylander-Clark, A.: Paleocene  
768 faulting in SE Sweden from U-Pb dating of slickenfiber calcite. *Terra Nova* 29, 321–328.  
769 <https://doi.org/10.1111/ter.12280>, 2017.
- 770 Gürpınar, A.: The importance of paleoseismology in seismic hazard studies for critical  
771 facilities. *Tectonophysics*, 408, 23–28, doi: 10.1016/j.tecto.2005.05.042, 2005.
- 772 Hickson, C.J. and Juras, S.J.: Sample contamination by grinding. *Canadian Mineralogist* 24,  
773 585–589, 1986.
- 774 Hutchison, C.S.: *Laboratory Handbook of Petrographic Techniques*. Wiley-Interscience, New  
775 York, 527 pp, 1974.
- 776 Institute for Geology and Subsurface Research: Sparti Sheet, photogeological map of Greece,  
777 1969.
- 778 Jolivet, L., Faccenna, C., Huet, B., Labrousse, L., Le Pourhiet, L., Lacombe, O., Lecomte, E.,  
779 Burov, E., Denèle, Y., Brun, J.-P., Philippon, M., Paul, A., Salaün, G., Karabulut, H.,  
780 Piromallo, C., Monié, P., Gueydan, F., Okay, A.I., Oberhänsli, R., Pourteau, A., Augier,  
781 R., Gadenne, L., and Driussi, O.: Aegean tectonics: Strain localisation, slab tearing and  
782 trench retreat. *Tectonophysics*, 597–598, 1–33, 2013.
- 783 Lifton, N.A., Bieber, J.W., Clem, J.M., Duldig, M.L., Evenson, P., Humble, J.E., and Pyle,  
784 R.: Addressing solar modulation and long-term uncertainties in scaling secondary cosmic  
785 rays for in situ cosmogenic nuclide applications. *Earth and Planetary Science Letters*,  
786 239, 140–161, 2005.
- 787 Lifton, N.A., Sato, T., Dunai, T.J.: Scaling in situ cosmogenic nuclide production rates using  
788 analytical approximations to atmospheric cosmic-ray fluxes. *Earth and Planetary Science  
789 Letters*, 386, 149–160, 2014.
- 790 Lifton, N.A., Smart, D.F., Shea, M.A.: Scaling time-integrated in situ cosmogenic nuclide  
791 production rates using a continuous geomagnetic model. *Earth and Planetary Science  
792 Letters*, 268, 190–201, 2008.
- 793 Manighetti, I., Boucher, E., Chauvel, C., Schlagenhauf, A., Benedetti, L.: Rare earth elements  
794 record past earthquakes on exhumed limestone fault planes. *Terra Nova*, 22, 477–482,  
795 doi: 10.1111/j.1365-3121.2010.00969.x, 2010.
- 796 Marrero, S.M., Phillips, F.M., Caffee, M.W., Gosse, J.C.: CRONUS-Earth cosmogenic  $^{36}\text{Cl}$   
797 calibration. *Quaternary Geochronology*, 31, 199–219, 2016.
- 798 McCalpin, J.P.: *Paleoseismology*, Academic press, 613 pp., 2009.
- 799 McDonough, W.F., and Sun, S.-s.: The composition of the Earth. *Chemical Geology*, 120,  
800 223–253, 1995.
- 801 Michetti, A.M., Audemard M., F.A. and Marco, S.: Future trends in paleoseismology:  
802 Integrated study of the seismic landscape as a vital tool in seismic hazard analyses  
803 *Tectonophysics*, 408, 3–21, 2005.

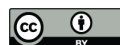

- 804 Mitchell, S.G., Matmon, A., Bierman, P.R., Enzel, Y., Caffee, M., and Rizzo, D.:  
805 Displacement history of a limestone normal fault scarp, northern Israel, from cosmogenic  
806 Cl-36. *Journal of Geophysical Research-Solid Earth*, 106, 4247–4264, doi:  
807 10.1029/2000JB900373, 2001.
- 808 Moraetis, D., Mouslopoulou, V., and Pratikakis, A.: Sorption of the Rare Earth Elements and  
809 Yttrium (REE-Y) in calcite: the mechanism of a new effective tool in identifying  
810 paleoearthquakes on carbonate faults. *Geophysical Research Abstracts*, 17, EGU2015-  
811 3437, 2015.
- 812 Mouslopoulou, V., Moraetis, D., and Fassoulas, C.: Identifying past earthquakes on carbonate  
813 faults: Advances and limitations of the ‘Rare Earth Element’ method based on analysis of  
814 the Spili Fault, Crete, Greece. *Earth and Planetary Science Letters*, 309, 45–55, 2011.
- 815 Mozafari, N., Özkaymak, C., Sümer, Ö, Tikhomirov, D., Uzel, B., Yeşilyurt, S., Ivy-Ochs, S.,  
816 Vockenhuber, C., Sözbilir, H., and Akçar, N.: Seismic history of western Anatolia during  
817 the last 16 kyr determined by cosmogenic <sup>36</sup>Cl dating. *Swiss Journal of Geosciences* 115,  
818 5, <https://doi.org/10.1186/s00015-022-00408-x>, 2022.
- 819 Muhs, D.R., Budahn, J., Avila, A., Skipp, G., Freeman, J., Patterson, D.: The role of African  
820 dust in the formation of Quaternary soils on Mallorca, Spain and implications for the  
821 genesis of Red Mediterranean soils. *Quaternary Science Reviews* 29, 2518–2543, 2010.
- 822 Muzikar, P., Elmore, D., and Granger, D.E.: Accelerator mass spectrometry in geologic  
823 research. *Geological Society of America Bulletin*, 115, 643-654, doi: 10.1130/0016-  
824 7606(2003)115, 2003.
- 825 Nuriel, P., Rosenbaum, G., Zhao, J.-X., Feng, Y., Golding, S.D., Villemant, B., and  
826 Weinberger, R.: U-Th dating of striated fault planes. *Geology*, 40, 647–650, 2012.
- 827 Palumbo, L., Benedetti, L., Bourlès, D., Cinque, A., and Finkel, R.: Slip history of the  
828 Magnola fault (Apennines, Central Italy) from <sup>36</sup>Cl surface exposure dating: evidence for  
829 strong earthquakes over the Holocene. *Earth and Planetary Science Letters*, 225, 163–  
830 176, doi: 10.1016/j.epsl.2004.06.012, 2004.
- 831 Papanikolaou, I.D., Roberts, G.P., Deligiannakis, G., Sakellariou, A., and Vassilakis, E.: The  
832 Sparta Fault, Southern Greece: From segmentation and tectonic geomorphology to  
833 seismic hazard mapping and time dependent probabilities. *Tectonophysics*, 597–598, 85–  
834 105, 2013.
- 835 Pavlides, S. and Caputo, R.: Magnitude versus faults’ surface parameters: quantitative  
836 relationships from the Aegean Region. *Tectonophysics*, 380, 159–188, 2004.
- 837 Pope, R.J. and Wilkinson, K.N.: Reconciling the roles of climate and tectonics in Late  
838 Quaternary fan development on the Spartan piedmont, Greece. In: A.M. Harvey, A.E.  
839 Mather, and M. Stokes, (Eds), *Alluvial Fans: Geomorphology, Sedimentology,*  
840 *Dynamics*. Geological Society, London, Special Publications, 251, 133–152. The  
841 Geological Society of London, 2005.
- 842 Röshoff, K. and Cosgrove, J.: Sedimentary dykes in the Oskarshamn-Västervik area. A study  
843 of the mechanism of formation. *SKB Report R-02-37*, 98 pp, 2002.
- 844 Roy, C.J.: Clastic dykes of the Pikes Peak region. *Geological Society of America Bulletin*,  
845 57, 1226, 1946.
- 846 Sagy, A. and Brodsky, E.E.: Geometric and rheological asperities in an exposed fault zone.  
847 *Journal of Geophysical Research*, 114, B02301, doi: 10.1029/2008JB005701, 2009.
- 848 Schlägenhauf, A., Gaudemer, Y., Benedetti, L., Manighetti, I., Palumbo, L.,  
849 Schimmelpfennig, I., Finkel, R., and Pou, K.: Using in situ Chlorine-36 cosmonuclide to  
850 recover past earthquake histories on limestone normal fault scarps: a reappraisal of  
851 methodology and interpretations. *Geophysical Journal International*, 182, 36–72, doi:  
852 10.1111/j.1365-246X.2010.04622.x, 2010.





- 853 Sharma, P., Kubik, P.W., Fehn, U., Gove, H.E., Nishiizumi, K. and Elmore, D.: Development  
854 of Cl-36 Standards for AMS. *Nuclear Instruments & Methods in Physics Research*  
855 Section B-Beam Interactions with Materials and Atoms, 52, 410-415, doi: 10.1016/0168-  
856 583X(90)90447-3, 1990.
- 857 Sikora, F.J. and Moore, K.P. (Eds.): *Soil Test Methods from the Southeastern United States.*  
858 Southern Cooperative Series Bulletin, 419, 211 p., 2014.
- 859 Stone, J.O.: Air pressure and cosmogenic isotope production. *Journal of Geophysical*  
860 *Research*, 105, B10, 23753-23759, 2000.
- 861 Stone, J.O.: Terrestrial chlorine-36 production from spallation of iron. In: Abstract of 10<sup>th</sup>  
862 International Conference on Accelerator Mass Spectrometry, Berkeley, California, USA.,  
863 2005.
- 864 Stone, J.O., Allan, G.L., Fifield, L.K., and Cresswell, R.G.: Cosmogenic chlorine-36 from  
865 calcium spallation. *Geochimica et Cosmochimica Acta*, 60, 679-692, doi: 10.1016/0016-  
866 7037(95)00429-7, 1996.
- 867 Takahashi, Y., Chatellier, X., Hattori, K.H., Kato, K., and Fortin, D.: Adsorption of rare earth  
868 elements onto bacterial cell walls and its implication for REE sorption onto natural  
869 microbial mats. *Chemical Geology*, 219, 53–67, 2005.
- 870 Tesson, J., Pace, B., Benedetti, L., Visini, F., Delli Roccoli, M., Arnold, M., Aumaître, G.,  
871 Bourlès, D.L., and Keddadouche, K.: Seismic slip history of the Pizzalto fault (central  
872 Apennines, Italy) using in situ-produced <sup>36</sup>Cl cosmic ray exposure dating and rare earth  
873 element concentrations. *Journal of Geophysical Research Solid Earth*, 121, 1983–2003,  
874 doi:10.1002/2015JB012565, 2016.
- 875 Woodcock, N.H. and Mort, K.: Classification of fault breccias and related fault rocks.  
876 *Geological Magazine*, 145, 435–440, doi: 10.1017/S0016756808004883, 2008.
- 877 Zreda, M. and Noller, J.: Ages of prehistoric earthquakes revealed by cosmogenic chlorine-36  
878 in a bedrock fault scarp at Hebgen Lake. *Science*, 282, 1097–1099, 1998.





879 **Table 1:** Parameters used to give best fits of modelled profiles to measured <sup>36</sup>Cl  
 880 concentration profiles, following Schlagenhauf et al. (2010).

| Profile | $\alpha$ (°) | $\beta$ (°) | $\gamma$ (°) | Scarp (cm) | $\rho_{rock}$ (g cm <sup>-3</sup> ) | $\rho_{colluvium}$ (g cm <sup>-3</sup> ) | <sup>36</sup> Cl P <sub>0</sub> (at. g <sup>-1</sup> yr <sup>-1</sup> ) | $\epsilon$ (mm yr <sup>-1</sup> ) | Pre (yr) | Age (kyr B.P.)                                                     | Slip (cm)                     | RMSw | AICc | $\chi^2_{red}$ |
|---------|--------------|-------------|--------------|------------|-------------------------------------|------------------------------------------|-------------------------------------------------------------------------|-----------------------------------|----------|--------------------------------------------------------------------|-------------------------------|------|------|----------------|
| Fig. 3a | 42           | 61          | 20           | 730        | 2.65                                | 1.95                                     | 59.4                                                                    | 0.02                              | 10 300   | 5.98 ± 0.4,<br>3.8 ± 0.3,<br>3.2 ± 0.3,<br>2.8 ± 0.2,<br>2.3 ± 0.2 | 140, 120,<br>130, 120,<br>140 | 10   | 859  | 3              |
| Fig. 3b | 49           | 61          | 20           | 730        | 2.65                                | 2.01                                     | 59.4                                                                    | 0.02                              | 3 900    | 2.5 ± 0.2,<br>2.3 ± 0.2                                            | 60, 140                       | 5    | 406  | 2              |
| Fig. 3c | 42           | 61          | 20           | 742        | 2.65                                | 1.95                                     | 59.4                                                                    | 0.02                              | 12 000   | 8.6 ± 0.6,<br>5.8 ± 0.4,<br>3.8 ± 0.3,<br>3.2 ± 0.3,<br>2.5 ± 0.3  | 140, 120,<br>130, 120,<br>140 | 19   | 1338 | 7              |
| Fig. 3d | 42           | 61          | 20           | 730        | 2.65                                | 1.95                                     | 59.4                                                                    | 0.02                              | 10 300   | 5.9 ± 0.4,<br>3.0 ± 0.3,<br>2.8 ± 0.2,<br>1.9 ± 0.2                | 240, 140,<br>180, 80          | 12   | 875  | 5              |

881  $\alpha$  is hanging wall colluvial surface dip angle;  $\beta$  is scarp dip angle;  $\gamma$  is the dip angle of the hillslope above the fault scarp;  $\epsilon$  is  
 882 scarp erosion rate; Pre is pre-exposure; Age is inferred earthquake age(s) with 0 inserted to model scarp samples from below  
 883 the surface of the hanging wall colluvium; Slip is the inferred displacement for each earthquake. On each profile, the oldest age  
 884 and associated displacement, shown in grey, are fitted to the top of the vertical sample transect rather than fitted to a step in  
 885 <sup>36</sup>Cl concentration; RMSw is weighted root mean square; AICc is Akaike Information Criterion;  $\chi^2_{red}$  is reduced Chi-square.  
 886 Model best fits for each data set are shown in black. The <sup>36</sup>Cl production rate of 59.4 ± 4.3 at g<sup>-1</sup> yr<sup>-1</sup> is taken from Lifton et al.  
 887 (2005).

888



889 **Figures**

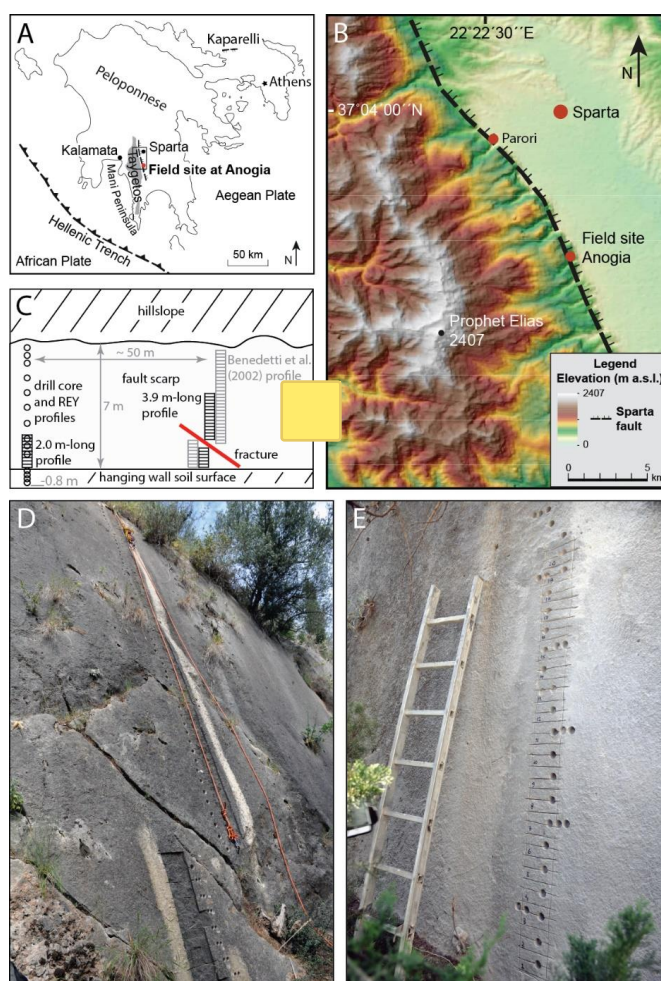

890

891 **Fig. 1:** Study site. A. The study site location in Peloponnese, Greece. Key tectonic features  
 892 are shown. Box indicates location of panel B. B. The location of the Sparta fault, separating  
 893 the Taygetos Mountains from the Sparta basin. The location of the Anogia field site used both  
 894 in this study and in Benedetti et al. (2002) is shown. Benedetti et al. (2002) located a second  
 895 sampling transect at Parori (also shown). The digital elevation model has a 24 m resolution  
 896 and is derived from ASTER GDEM (GDEM2), which is a product of NASA and METI  
 897 (Japan). C. Schematic diagram of the Sparta fault scarp at Anogia, showing the locations of  
 898 our vertical  $^{36}\text{Cl}$  and REY sampling transects, and the  $^{36}\text{Cl}$  sampling transect of Benedetti et  
 899 al. (2002). D. Photograph showing the location of our 3.9 m-long profile, prior to sampling.  
 900 The existing sample scar is from Benedetti et al. (2002). E. Photograph showing the location  
 901 of our REY and drill core profiles, after sampling, and our 2.0 m long profile, before  
 902 sampling.

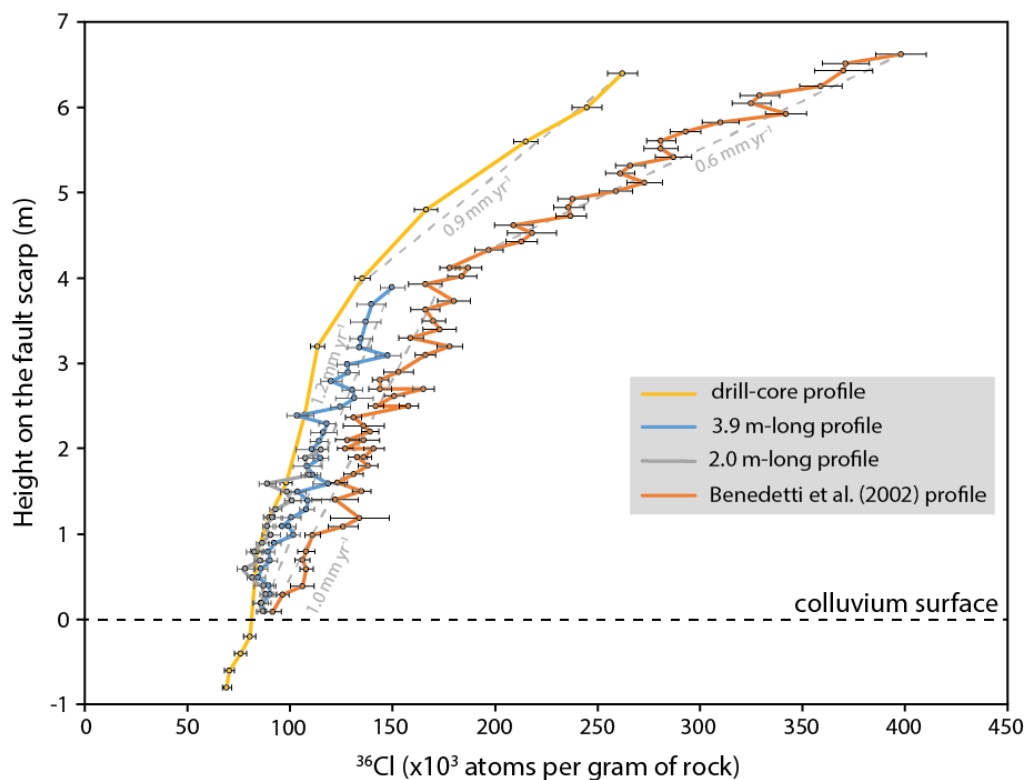

903

904

905 **Fig. 2:** Sparta fault  $^{36}\text{Cl}$  concentration profiles. Error bars indicate  $1\sigma$  measurement

906 uncertainties. Time-averaged uplift rates inferred from profile gradients are shown in grey.

907 For the lower, more recently exposed, parts of the scarp surface, uplift rates are calculated for

908 time starting from the present day. If uplift rates are alternatively calculated as occurring

909 prior to the subaerial exposure of the lowermost samples by the most recent earthquake,

910 cumulative uplift rates increase to  $2.8 \text{ mm yr}^{-1}$  and  $1.8 \text{ mm yr}^{-1}$  for the lower parts of the 3.9

911 m-long and Benedetti et al. (2002) profiles, respectively.

912

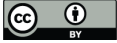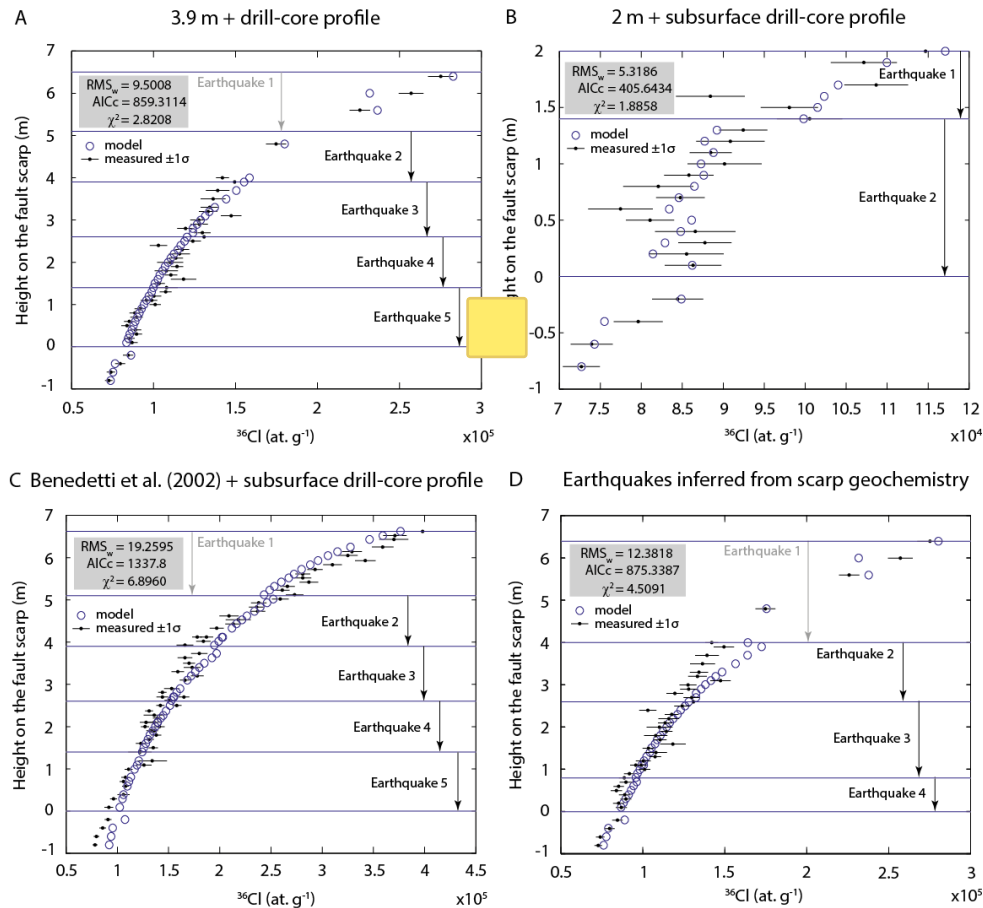

913  
914

915 **Fig. 3:** Best fits of profiles modelled according to Schlagenhaut et al. (2010) to measured  
 916 Sparta fault  $^{36}\text{Cl}$  concentration profiles. Down-arrows indicate the section of scarp exhumed  
 917 during each earthquake. Best fits of modelled profiles to measured data are indicated by  
 918 lowest attainable values for each of  $\text{RMS}_w$ ,  $\chi^2_{red}$ , and  $\text{AICc}$ . A. Anogia 3.9 m profile plus drill  
 919 core profile data above 3.9 m and below the present hanging wall colluvium surface. B.  
 920 Anogia 2.0 m profile plus drill core profile data from below the present hanging wall  
 921 colluvium surface. C. Benedetti et al. (2002) data, remodeled using the same parameters as  
 922 for panel A . The modelled profile is smooth because scarp composition is based on a mean  
 923 value taken from our data. Our drill core subsurface samples were also used to help remodel  
 924 the Benedetti et al. (2002) data, which required adding 13% on to their measured  
 925 concentrations. D. Same profile as in A but with earthquakes inferred from the fault scarp  
 926 geochemistry.

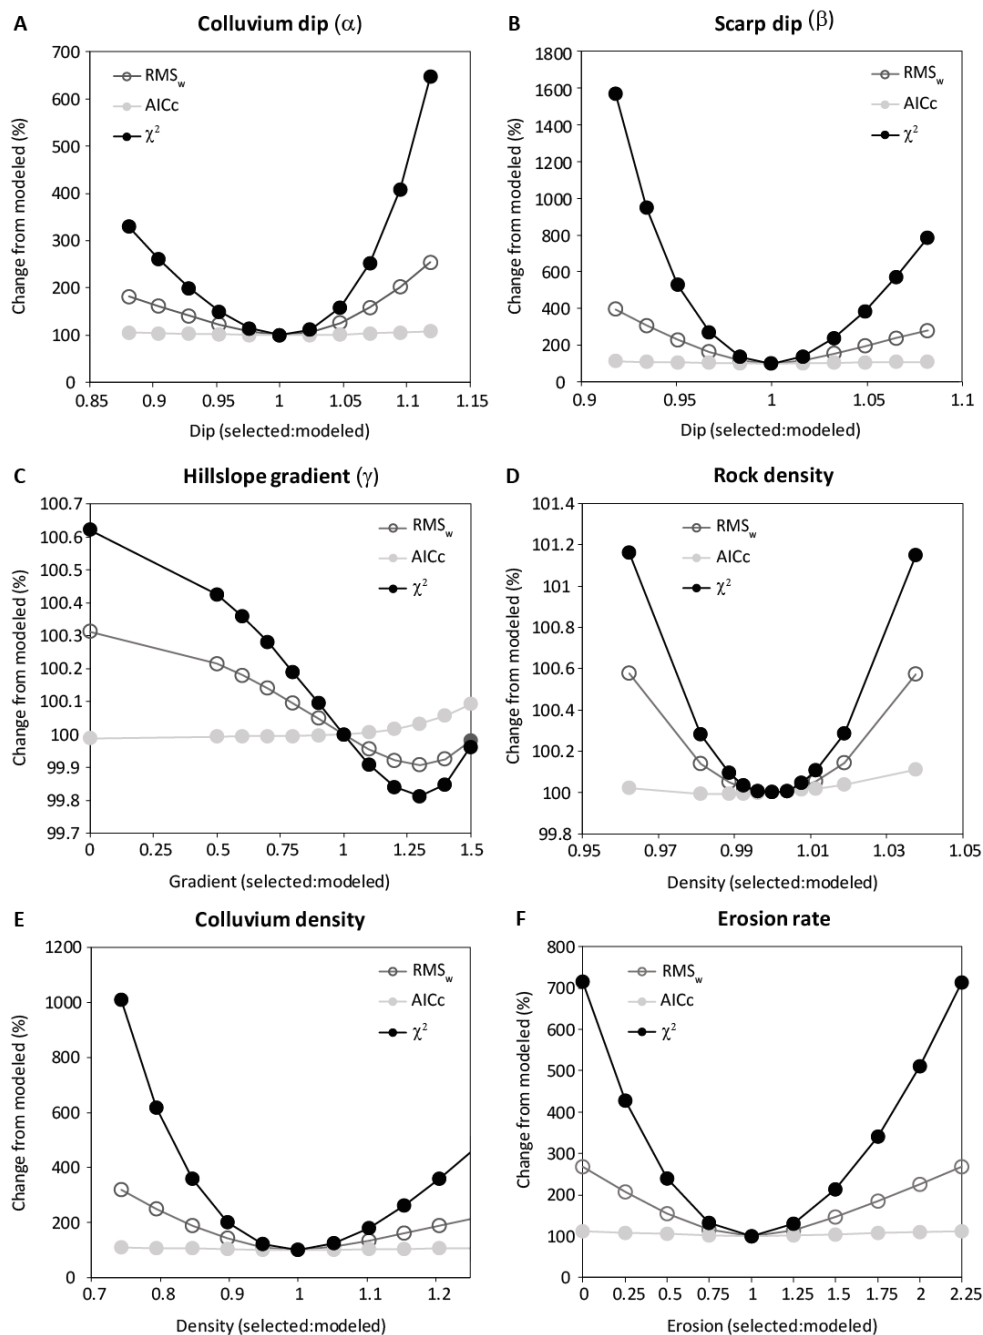

927  
928  
929  
930  
931  
932

**Fig. 4:** Sensitivity of fits of profiles modelled according to Schlagenhauf et al. (2010) to measured Sparta fault  $^{36}\text{Cl}$  concentration profiles, according to input parameters. A. Colluvial wedge dip B. Scarp dip C. Slope angle above the scarp. D. Scarp rock density E. Colluvium density F. Scarp erosion rate.



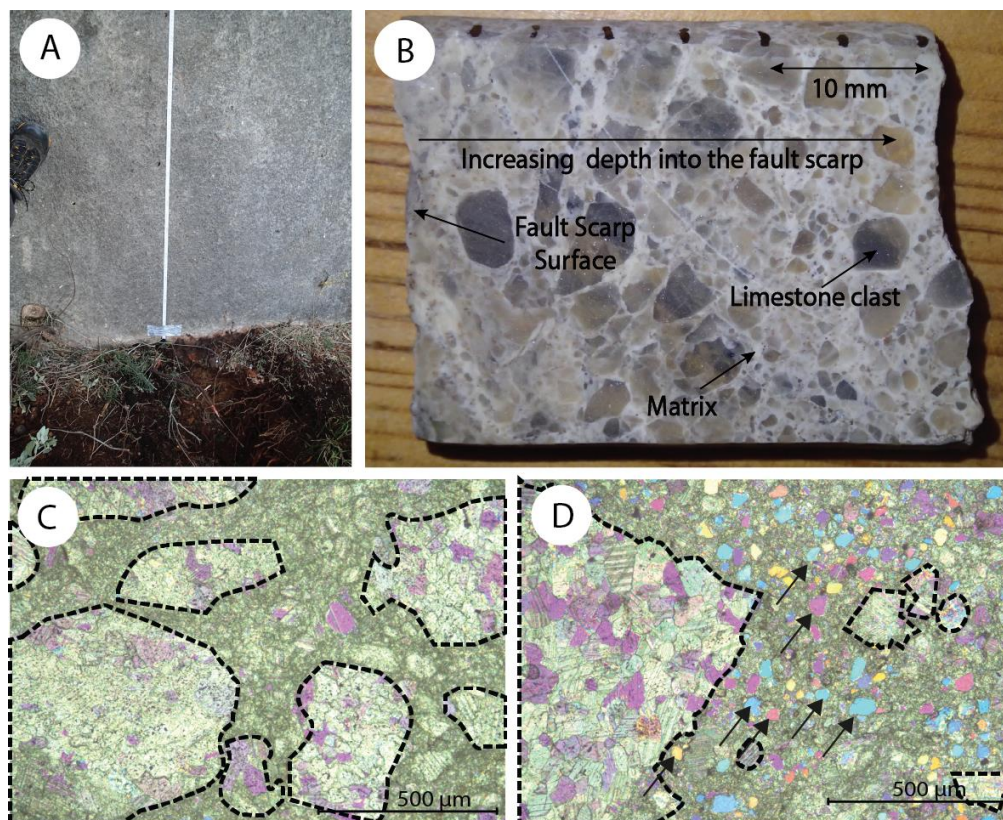

933  
934 **Fig. 5:** The heterogeneous fault breccia that comprises the Sparta fault scarp surface. A. The  
935 Sparta fault scarp surface appears smooth and homogenous, as illustrated by this photograph  
936 of the scarp base at Anogia (upper half of the dug trench in the foreground). B. Fault breccia  
937 is revealed in a cut drill core, where clasts of host limestone are cemented in a fine matrix. C.  
938 A photomicrograph shows limestone clasts (dotted outlines) comprising about 60% of the  
939 thin section area. D. A photomicrograph shows fine matrix comprising about 60% of the thin  
940 section area. Arrows indicate quartz.  
941

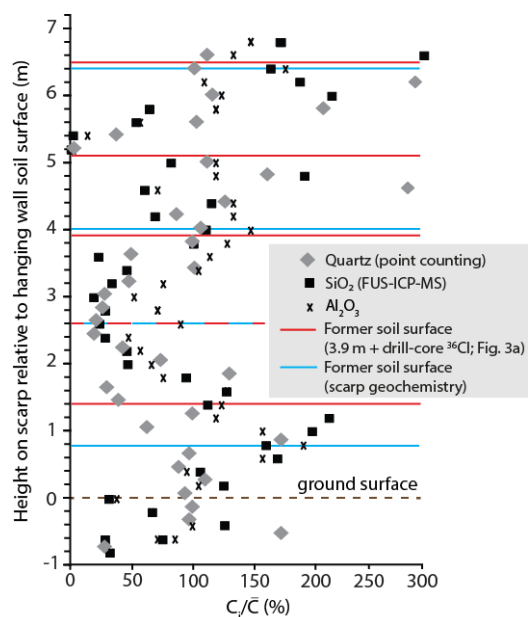

942

943 **Fig. 6:** Concentrations of  $\text{Al}_2\text{O}_3$  and  $\text{SiO}_2$ , and quartz abundances from point counting, along

944 a vertical profile, Sparta fault scarp, Anogia. The concentration of each element ( $C_i$ ) is

945 normalized to its mean concentration through the profile ( $C_i/\bar{C}$ ). The locations of former soil

946 surface horizons inferred from  $^{36}\text{Cl}$  concentrations and from the scarp geochemistry are

947 shown for reference.

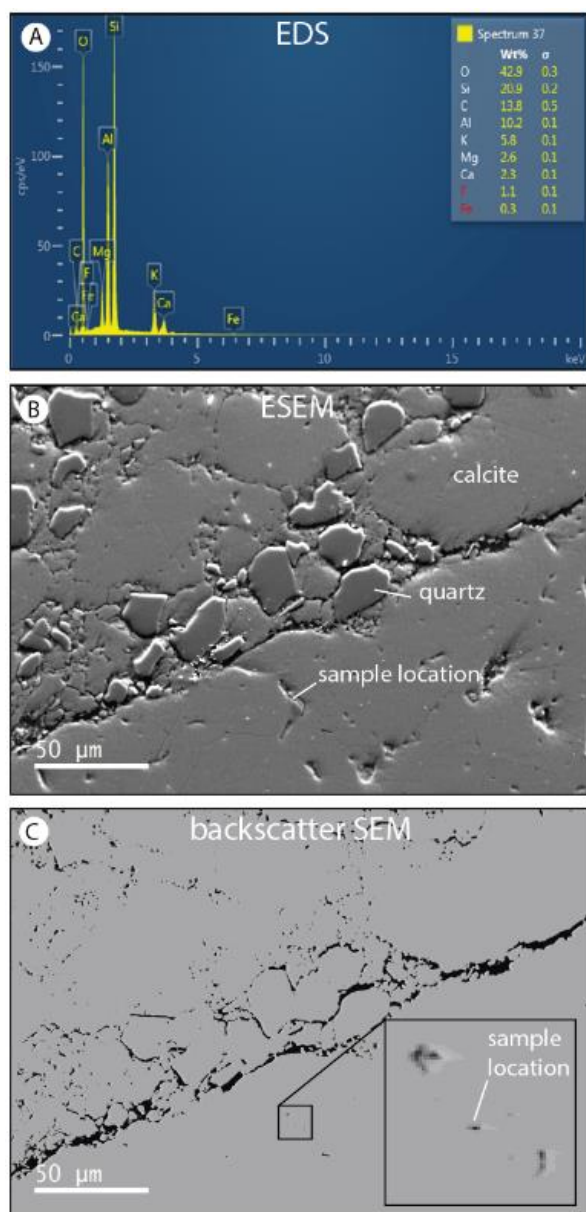

948

949 **Fig. 7:** Energy-dispersive X-ray spectroscopy (EDS) elemental abundances, and  
950 environmental scanning electron microscope (ESEM) and backscatter SEM imagery of a thin  
951 section of fault breccia comprising the Sparta fault scarp surface at 1.1 m above the hanging  
952 wall. (A). Element abundances in a pore, the location of which is shown in panels B and C.  
953 Si, Al, and K are abundant relative to Ca, which indicates that clay, e.g., illite, is lining the  
954 pore. (B) Quartz is an abundant constituent of the thin section matrix. (C) Porosity, shown in  
955 black; note its spatial association with quartz. The location of the sample used in panel A is in  
956 a small pore, shown in the inset.

957



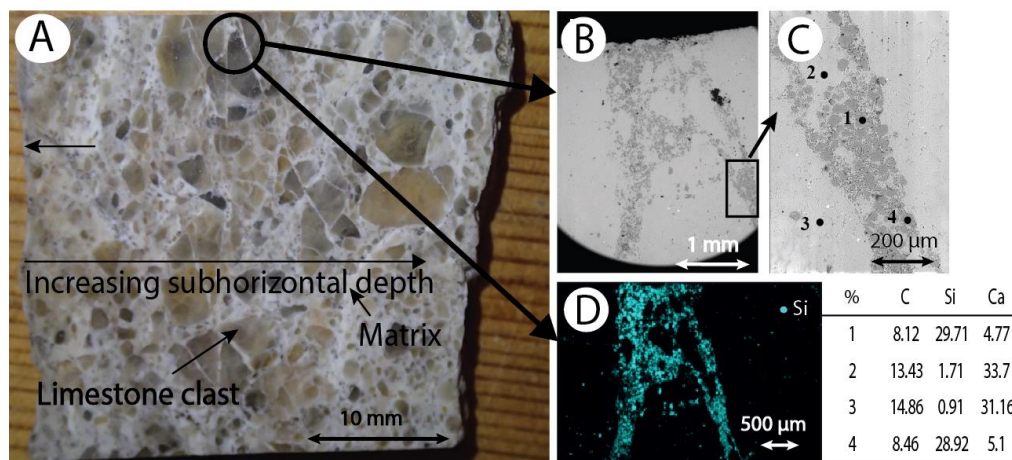

958

959

**Fig. 8:** Concentrations of Si in the Sparta fault breccia, 1.1 m above the scarp base at Anogia.

960

A. A cut drill core from the Sparta fault scarp at Anogia showing limestone clasts cemented

961

in fine matrix. The circled fine matrix is examined under high resolution in panels B to D. B.

962

An ESEM image showing the sample location for spot elemental analysis (rectangle). C.

963

Sample points for elemental analysis using EDS, with values shown in the table. D. The

964

abundance of Si in the fine matrix illustrated in magenta for the circled part of the thin

965

section shown in panel A.

966

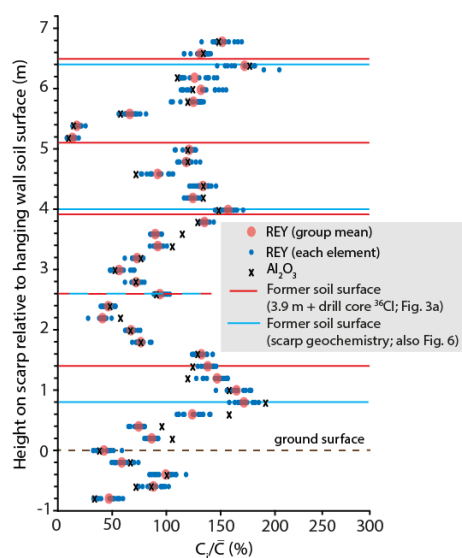

967

968

**Fig. 9:** Concentrations of rare-earth elements and yttrium (REY) along a vertical profile on

969

the Sparta fault at Anogia. Mean values for all REY elements at each sample point are shown

970

in red dots, whereas individual REY elements are shown in blue dots. The concentration of

971

each element ( $C_i$ ) is normalized to its mean concentration through the profile ( $C_i/\bar{C}$ ).



972 Concentrations of  $\text{Al}_2\text{O}_3$  and former soil surface horizons inferred from  $^{36}\text{Cl}$  concentrations  
973 profiles and geochemical data, are shown for reference.  
974

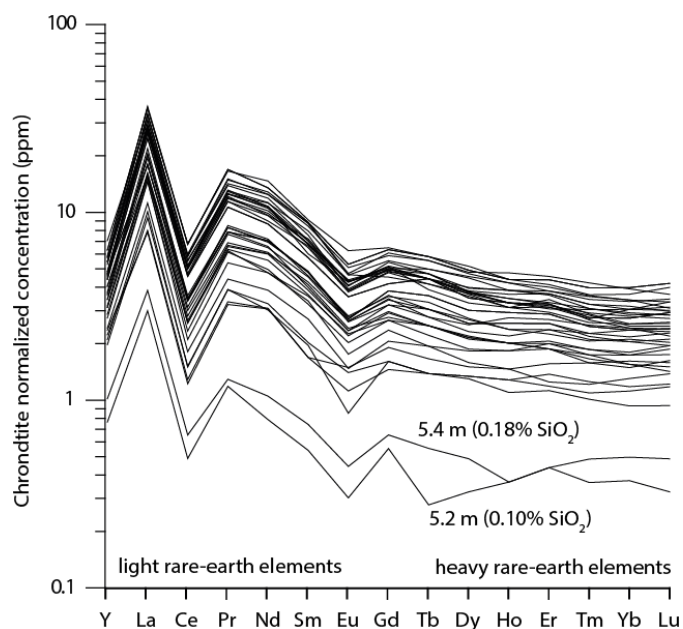

975  
976 **Fig. 10:** Concentrations of rare-earth elements and yttrium (REY) normalized to chondrite  
977 composition (McDonough and Sun, 1995) for the Sparta Fault scarp at Anogia. Each line  
978 shows a measured location on the scarp surface. The two low REY outliers at 5.2 m and 5.4  
979 m also have exceptionally low  $\text{SiO}_2$ .  
980

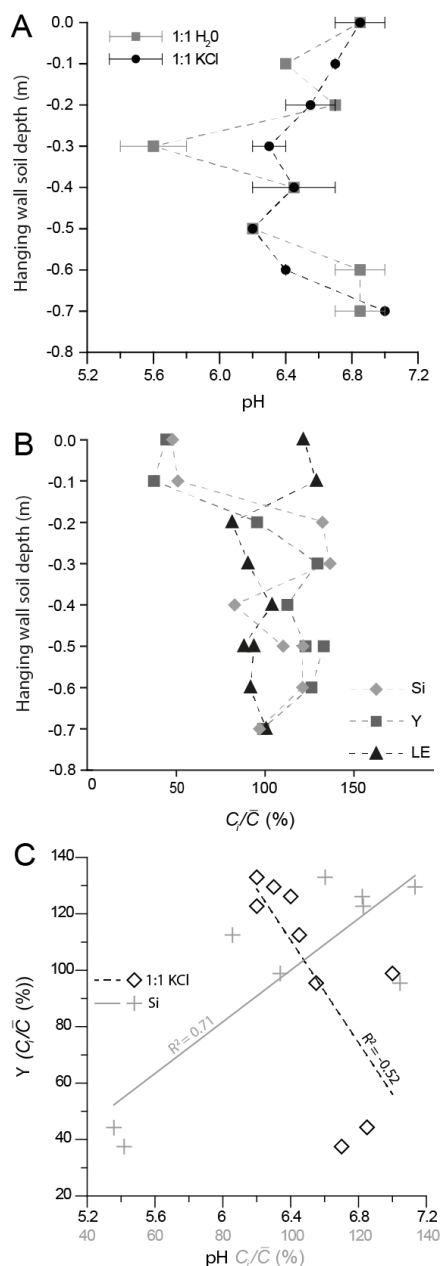

981

982 **Fig. 11:** Hanging wall soil chemistry, adjacent to the Sparta fault scarp at Anogia. A. Soil pH

983 uncertainty ranges show the  $\leq 0.5$  resolution of the indicator strips. B. Concentrations of Si,

984 Y, and elements too light to be measured using handheld XRF (LE, including C) along the

985 vertical soil profile. Each element has been normalized through division by its mean

986 concentration through the soil. C. Y concentrations plotted against pH (measured from 1:1

987 KCl) and Si concentration at each measured depth interval beneath the soil surface.

988
